# Supplementary material
Source: publisher figshare collection journal article supplement (https://aacr.figshare.com/ndownloader/files/39849245)
Supplement: Supplementary file 1 [file 39849245]

## Sheet: TableS1.xlsx
Table S1. WGCNA modules
Probe ID	Gene Symbol	Entrez ID	Ensemble ID	Module Name	Connectivity*
22802_at	CLCA4	22802	ENSG00000016602	Early2	0.145096
759_at	CA1	759	ENSG00000133742	Early2	0.157734
343_at	AQP8	343	ENSG00000103375	Early2	0.157691
4314_at	MMP3	4314	ENSG00000149968	Late1	0.118765
2641_at	GCG	2641	ENSG00000115263	Early2	0.142474
6192_at	RPS4Y1	6192	ENSG00000129824	Early2	0.0170164
3576_at	IL8	3576	ENSG00000169429	Late1	0.129031
9073_at	CLDN8	9073	ENSG00000156284	Early2	0.117133
762_at	CA4	762	ENSG00000167434	Early2	0.157332
2980_at	GUCA2A	2980	ENSG00000197273	Early2	0.176273
5967_at	REG1A	5967	ENSG00000115386	Early1	0.061063
9429_at	ABCG2	9429	ENSG00000118777	Early2	0.161948
653808_at	ZG16	653808	ENSG00000174992	Early2	0.149191
6947_at	TCN1	6947	ENSG00000134827	Early1	0.0846199
57126_at	CD177	57126	ENSG00000204936	Early2	0.126729
7366_at	UGT2B15	7366	ENSG00000196620	Early2	0.0732673
4312_at	MMP1	4312	ENSG00000196611	Late1	0.112408
55532_at	SLC30A10	55532	ENSG00000196660	Early2	0.158403
79799_at	UGT2A3	79799	ENSG00000135220	Early2	0.134327
6374_at	CXCL5	6374	ENSG00000163735	Late1	0.108061
94234_at	FOXQ1	94234	ENSG00000164379	Early1	0.142137
4316_at	MMP7	4316	ENSG00000137673	Early1	0.106118
2920_at	CXCL2	2920	ENSG00000081041	Late1	0.119965
10351_at	ABCA8	10351	ENSG00000141338	Early2	0.12827
5570_at	PKIB	5570	ENSG00000135549	Early2	0.168956
1116_at	CHI3L1	1116	ENSG00000133048	Late1	0.119468
290_at	ANPEP	290	ENSG00000166825	Early2	0.0945006
1836_at	SLC26A2	1836	ENSG00000155850	Early2	0.149888
2919_at	CXCL1	2919	ENSG00000163739	Late1	0.137628
4499_at	MT1M	4499	ENSG00000205364	Early2	0.101666
4319_at	MMP10	4319	ENSG00000166670	Late1	0.111879
83998_at	REG4	83998	ENSG00000134193	Early1	0.0433479
6279_at	S100A8	6279	ENSG00000143546	Late1	0.115814
6750_at	SST	6750	ENSG00000157005	Early2	0.127684
50506_at	DUOX2	50506	ENSG00000140279	Early1	0.065579
1811_at	SLC26A3	1811	ENSG00000091138	Early2	0.114932
2921_at	CXCL3	2921	ENSG00000163734	Late1	0.127172
8671_at	SLC4A4	8671	ENSG00000080493	Early2	0.177522
5268_at	SERPINB5	5268	ENSG00000206075	Early1	0.0763376
57214_at	KIAA1199	57214	ENSG00000103888	Early1	0.14065
1670_at	DEFA5	1670	ENSG00000164816	Early1	0.0470747
6476_at	SI	6476	ENSG00000090402	Early2	0.115349
54831_at	BEST2	54831	ENSG00000039987	Early2	0.128087
57733_at	GBA3	57733	ENSG00000249948	Early2	0.125315
123264_at	SLC51B	123264	ENSG00000186198	Early2	0.176599
1087_at	CEACAM7	1087	ENSG00000007306	Early2	0.109965
126_at	ADH1C	126	ENSG00000248144	Early2	0.131696
55600_at	ITLN1	55600	ENSG00000179914	Early2	0.0963607
145741_at	C2CD4A	145741	ENSG00000198535	Early1	0.137232
643911_at	CRNDE	643911	ENSG00000245694	Early1	0.127198
3934_at	LCN2	3934	ENSG00000148346	Early1	0.0916955
27299_at	ADAMDEC1	27299	ENSG00000134028	Early2	0.116712
1755_at	DMBT1	1755	ENSG00000187908	Early1	0.0651691
9518_at	GDF15	9518	ENSG00000130513	Early1	0.134794
2215_at	FCGR3B	2215	ENSG00000162747	Late3	0.143645
760_at	CA2	760	ENSG00000104267	Early2	0.132963
9075_at	CLDN2	9075	ENSG00000165376	Early1	0.0963565
6338_at	SCNN1B	6338	ENSG00000168447	Early2	0.133473
1030_at	CDKN2B	1030	ENSG00000147883	Early2	0.171158
646627_at	LYPD8	646627	ENSG00000266949	Early2	0.159323
256691_at	MAMDC2	256691	ENSG00000165072	Early2	0.13924
2981_at	GUCA2B	2981	ENSG00000044012	Early2	0.169289
5408_at	PNLIPRP2	5408	ENSG00000165862	Early2	0.0677197
54596_at	L1TD1	54596	ENSG00000240563	Early1	0.0577282
5105_at	PCK1	5105	ENSG00000124253	Early2	0.126594
266675_at	BEST4	266675	ENSG00000142959	Early2	0.140232
27290_at	SPINK4	27290	ENSG00000122711	Early1	0.040947
10170_at	DHRS9	10170	ENSG00000073737	Early2	0.113881
4070_at	TACSTD2	4070	ENSG00000184292	Early1	0.0897551
137075_at	CLDN23	137075	ENSG00000253958	Early2	0.176543
80157_at	CWH43	80157	ENSG00000109182	Early2	0.119771
3598_at	IL13RA2	3598	ENSG00000123496	Late1	0.112165
79908_at	BTNL8	79908	ENSG00000113303	Early2	0.0851827
6355_at	CCL8	6355	ENSG00000108700	Early3	0.0863517
5354_at	PLP1	5354	ENSG00000123560	Early2	0.129741
5743_at	PTGS2	5743	ENSG00000073756	Late1	0.118652
84666_at	RETNLB	84666	ENSG00000163515	Early2	0.0301979
9153_at	SLC28A2	9153	ENSG00000137860	Early2	0.0485976
1001_at	CDH3	1001	ENSG00000062038	Early1	0.147683
11005_at	SPINK5	11005	ENSG00000133710	Early2	0.0763319
389023_at	LOC389023	389023	ENSG00000235026	Early2	0.112782
5067_at	CNTN3	5067	ENSG00000113805	Early2	0.105224
63928_at	CHP2	63928	ENSG00000166869	Early2	0.160848
25845_at	PP7080	25845	ENSG00000188242	Early2	0.0749224
5968_at	REG1B	5968	ENSG00000172023	Early1	0.0590564
64167_at	ERAP2	64167	ENSG00000164308	Early2	0.038418
10050_at	SLC17A4	10050	ENSG00000146039	Early2	0.188351
125_at	ADH1B	125	ENSG00000196616	Early2	0.0983784
4488_at	MSX2	4488	ENSG00000120149	Early1	0.094916
54576_at	UGT1A8	54576	ENSG00000242366	Early2	0.15757
1671_at	DEFA6	1671	ENSG00000164822	Early1	0.0596542
10232_at	MSLN	10232	ENSG00000102854	Early1	0.0669436
57016_at	AKR1B10	57016	ENSG00000198074	Early2	0.135957
10481_at	HOXB13	10481	ENSG00000159184	Early2	0.0245731
1846_at	DUSP4	1846	ENSG00000120875	Early1	0.0959335
84281_at	C2orf88	84281	ENSG00000187699	Early2	0.198809
6286_at	S100P	6286	ENSG00000163993	Early1	0.1047
54827_at	NXPE4	54827	ENSG00000137634	Early2	0.11481
154661_at	RUNDC3B	154661	ENSG00000105784	Early2	0.153616
1114_at	CHGB	1114	ENSG00000089199	Early2	0.107602
79154_at	DHRS11	79154	ENSG00000108272	Early2	0.180227
253012_at	HEPACAM2	253012	ENSG00000188175	Early2	0.108821
3553_at	IL1B	3553	ENSG00000125538	Late3	0.134789
5122_at	PCSK1	5122	ENSG00000175426	Early1	0.0577229
10562_at	OLFM4	10562	ENSG00000102837	Early1	0.0501088
3248_at	HPGD	3248	ENSG00000164120	Early2	0.152897
1113_at	CHGA	1113	ENSG00000100604	Early2	0.148069
1179_at	CLCA1	1179	ENSG00000016490	Early2	0.0922098
79861_at	TUBAL3	79861	ENSG00000178462	Early2	0.149111
5320_at	PLA2G2A	5320	ENSG00000188257	Early2	0.0286826
23035_at	PHLPP2	23035	ENSG00000040199	Early2	0.175874
140803_at	TRPM6	140803	ENSG00000119121	Early2	0.151446
11148_at	HHLA2	11148	ENSG00000114455	Early2	0.161514
608_at	TNFRSF17	608	ENSG00000048462	Early3	0.0954167
3294_at	HSD17B2	3294	ENSG00000086696	Early2	0.131815
563_at	AZGP1	563	ENSG00000160862	Early1	0.0879878
8140_at	SLC7A5	8140	ENSG00000103257	Early1	0.157611
10874_at	NMU	10874	ENSG00000109255	Early1	0.0925573
5196_at	PF4	5196	ENSG00000163737	Early1	0.0854413
284217_at	LAMA1	284217	ENSG00000101680	Early2	0.105839
22822_at	PHLDA1	22822	ENSG00000139289	Early1	0.151473
5729_at	PTGDR	5729	ENSG00000168229	Early2	0.0909847
6689_at	SPIB	6689	ENSG00000269404	Early2	0.155512
91464_at	ISX	91464	ENSG00000175329	Early2	0.143424
9076_at	CLDN1	9076	ENSG00000163347	Early1	0.149132
91543_at	RSAD2	91543	ENSG00000134321	Early2	0.0606173
3491_at	CYR61	3491	ENSG00000142871	Late1	0.0942887
115908_at	CTHRC1	115908	ENSG00000164932	Late1	0.135653
430_at	ASCL2	430	ENSG00000183734	Early1	0.103656
4495_at	MT1G	4495	ENSG00000125144	Early2	0.0943246
2938_at	GSTA1	2938	ENSG00000244067	Early2	0.070397
28231_at	SLCO4A1	28231	ENSG00000101187	Early1	0.161932
270_at	AMPD1	270	ENSG00000116748	Early2	0.130116
766_at	CA7	766	ENSG00000168748	Early2	0.145994
25890_at	ABI3BP	25890	ENSG00000154175	Early2	0.0909204
2690_at	GHR	2690	ENSG00000112964	Early2	0.0855893
7102_at	TSPAN7	7102	ENSG00000156298	Early2	0.143847
2069_at	EREG	2069	ENSG00000124882	Late1	0.0713556
23136_at	EPB41L3	23136	ENSG00000082397	Early2	0.0956005
8418_at	CMAHP	8418	ENSG00000168405	Early2	0.0949734
3223_at	HOXC6	3223	ENSG00000197757	Early1	0.0525874
64922_at	LRRC19	64922	ENSG00000184434	Early2	0.154845
81693_at	AMN	81693	ENSG00000166126	Early2	0.147051
5243_at	ABCB1	5243	ENSG00000085563	Early2	0.0998906
1908_at	EDN3	1908	ENSG00000124205	Early2	0.182703
57758_at	SCUBE2	57758	ENSG00000175356	Early2	0.0968352
55655_at	NLRP2	55655	ENSG00000022556	Early2	0.0413398
10537_at	UBD	10537	ENSG00000213886	Late1	0.0725658
3957_at	LGALS2	3957	ENSG00000100079	Early2	0.0934762
84830_at	ADTRP	84830	ENSG00000111863	Early2	0.125742
286133_at	SCARA5	286133	ENSG00000168079	Early2	0.119477
90865_at	IL33	90865	ENSG00000137033	Early1	0.0869548
6550_at	SLC9A3	6550	ENSG00000066230	Early2	0.0714243
3642_at	INSM1	3642	ENSG00000173404	Early2	0.0653408
9122_at	SLC16A4	9122	ENSG00000168679	Early1	0.0802648
25984_at	KRT23	25984	ENSG00000108244	Early1	0.0763397
645784_at	ANKRD36BP2	645784	ENSG00000230006	Early3	0.0776103
6799_at	SULT1A2	6799	ENSG00000197165	Early2	0.189082
11082_at	ESM1	11082	ENSG00000164283	Late1	0.11294
6357_at	CCL13	6357	ENSG00000181374	Early2	0.0692867
114801_at	TMEM200A	114801	ENSG00000164484	Early2	0.0371823
644943_at	RASSF10	644943	NA	Early1	0.0492707
388335_at	TMEM220	388335	ENSG00000187824	Early2	0.112406
60675_at	PROK2	60675	ENSG00000163421	Late3	0.14199
11075_at	STMN2	11075	ENSG00000104435	Early2	0.111027
7130_at	TNFAIP6	7130	ENSG00000123610	Late3	0.157522
80031_at	SEMA6D	80031	ENSG00000137872	Early2	0.157075
84962_at	AJUBA	84962	ENSG00000129474	Early1	0.168473
144501_at	KRT80	144501	ENSG00000167767	Early1	0.114917
401074_at	LINC00960	401074	ENSG00000242516	Late1	0.0240033
2353_at	FOS	2353	ENSG00000170345	Early1	0.0605027
23650_at	TRIM29	23650	ENSG00000137699	Early1	0.104958
4494_at	MT1F	4494	ENSG00000198417	Early2	0.0886132
654433_at	LOC654433	654433	ENSG00000189223	Early2	0.0293575
79746_at	ECHDC3	79746	ENSG00000134463	Early2	0.0436664
79853_at	TM4SF20	79853	ENSG00000168955	Early2	0.0368311
138065_at	RNF183	138065	ENSG00000165188	Early1	0.111121
11012_at	KLK11	11012	ENSG00000167757	Early1	0.0647689
4224_at	MEP1A	4224	ENSG00000112818	Early2	0.125049
6363_at	CCL19	6363	ENSG00000172724	Early3	0.0770504
3426_at	CFI	3426	ENSG00000205403	Early1	0.0728092
195814_at	SDR16C5	195814	ENSG00000170786	Early1	0.0489473
1984_at	EIF5A	1984	ENSG00000132507	Early1	0.0502638
9963_at	SLC23A1	9963	ENSG00000170482	Early2	0.104688
54997_at	TESC	54997	ENSG00000088992	Early1	0.0960292
405753_at	DUOXA2	405753	ENSG00000140274	Early1	0.0675475
2162_at	F13A1	2162	ENSG00000124491	Early2	0.0809124
58476_at	TP53INP2	58476	ENSG00000078804	Early2	0.134478
3158_at	HMGCS2	3158	ENSG00000134240	Early2	0.097323
7804_at	LRP8	7804	ENSG00000157193	Early1	0.187753
53841_at	CDHR5	53841	ENSG00000099834	Early2	0.18528
200315_at	APOBEC3A	200315	ENSG00000128383	Late4	0.0785955
79949_at	PLEKHS1	79949	ENSG00000148735	Early1	0.0897494
6364_at	CCL20	6364	ENSG00000115009	Early1	0.0812507
255231_at	MCOLN2	255231	ENSG00000153898	Early2	0.085181
6402_at	SELL	6402	ENSG00000188404	Late3	0.124193
5139_at	PDE3A	5139	ENSG00000172572	Early2	0.0979492
10406_at	WFDC2	10406	ENSG00000101443	Early2	0.0325199
2167_at	FABP4	2167	ENSG00000170323	Early3	0.083707
84803_at	AGPAT9	84803	ENSG00000138678	Early2	0.119479
948_at	CD36	948	ENSG00000135218	Early3	0.0943037
597_at	BCL2A1	597	ENSG00000140379	Late3	0.154321
6819_at	SULT1C2	6819	ENSG00000198203	Early1	0.0586413
51316_at	PLAC8	51316	ENSG00000145287	Early2	0.111368
1604_at	CD55	1604	ENSG00000196352	Early1	0.0953154
10924_at	SMPDL3A	10924	ENSG00000172594	Early2	0.18515
11223_at	MST1L	11223	NA	Early2	0.0856318
83661_at	MS4A8	83661	ENSG00000166959	Early2	0.0975119
6696_at	SPP1	6696	ENSG00000118785	Late1	0.0942398
4246_at	SCGB2A1	4246	ENSG00000124939	Early2	0.0988276
401081_at	FLJ22763	401081	ENSG00000241224	Early2	0.113409
84707_at	BEX2	84707	ENSG00000133134	Early2	0.0573036
64081_at	PBLD	64081	ENSG00000108187	Early2	0.140886
8824_at	CES2	8824	ENSG00000172831	Early2	0.153248
50486_at	G0S2	50486	ENSG00000123689	Late3	0.135501
5270_at	SERPINE2	5270	ENSG00000135919	Early1	0.0723313
51196_at	PLCE1	51196	ENSG00000138193	Early2	0.139544
11240_at	PADI2	11240	ENSG00000117115	Early2	0.160761
6362_at	CCL18	6362	ENSG00000006074	Late2	0.101292
25907_at	TMEM158	25907	ENSG00000249992	Late1	0.125746
9603_at	NFE2L3	9603	ENSG00000050344	Early1	0.172795
1368_at	CPM	1368	ENSG00000135678	Early2	0.134305
8991_at	SELENBP1	8991	ENSG00000143416	Early2	0.109711
8313_at	AXIN2	8313	ENSG00000168646	Early1	0.0904268
978_at	CDA	978	ENSG00000158825	Early2	0.0737132
4487_at	MSX1	4487	ENSG00000163132	Early1	0.108271
1404_at	HAPLN1	1404	ENSG00000145681	Early2	0.128232
7076_at	TIMP1	7076	ENSG00000102265	Late1	0.126294
134285_at	TMEM171	134285	ENSG00000157111	Early2	0.142292
2494_at	NR5A2	2494	ENSG00000116833	Early2	0.145416
203859_at	ANO5	203859	ENSG00000171714	Early2	0.108371
652995_at	UCA1	652995	ENSG00000214049	Early1	0.0756261
285016_at	FAM150B	285016	ENSG00000189292	Early2	0.106899
29968_at	PSAT1	29968	ENSG00000135069	Early1	0.156868
9582_at	APOBEC3B	9582	ENSG00000179750	Early2	0.0766409
140738_at	TMEM37	140738	ENSG00000171227	Early2	0.149233
57458_at	TMCC3	57458	ENSG00000057704	Early2	0.146517
10418_at	SPON1	10418	ENSG00000262655	Early2	0.0784987
2118_at	ETV4	2118	ENSG00000175832	Early1	0.116626
120400_at	NXPE1	120400	ENSG00000095110	Early2	0.102321
3231_at	HOXD1	3231	ENSG00000128645	Early2	0.0917193
79762_at	C1orf115	79762	ENSG00000162817	Early2	0.156026
10071_at	MUC12	10071	ENSG00000205277	Early2	0.067463
220963_at	SLC16A9	220963	ENSG00000165449	Early2	0.112436
84189_at	SLITRK6	84189	ENSG00000184564	Early2	0.0464184
150538_at	SATB2-AS1	150538	ENSG00000225953	Early2	0.0912696
5266_at	PI3	5266	ENSG00000124102	Late1	0.063755
1800_at	DPEP1	1800	ENSG00000015413	Early1	0.0676165
7857_at	SCG2	7857	ENSG00000171951	Early2	0.0642416
10631_at	POSTN	10631	ENSG00000133110	Late2	0.116504
10637_at	LEFTY1	10637	ENSG00000243709	Early2	0.0426353
1776_at	DNASE1L3	1776	ENSG00000163687	Early2	0.1069
85477_at	SCIN	85477	ENSG00000006747	Early2	0.123442
3291_at	HSD11B2	3291	ENSG00000176387	Early2	0.164833
54443_at	ANLN	54443	ENSG00000011426	Early1	0.203857
4609_at	MYC	4609	ENSG00000136997	Early1	0.183158
9388_at	LIPG	9388	ENSG00000101670	Early1	0.111057
283316_at	CD163L1	283316	ENSG00000177675	Early2	0.10443
144402_at	CPNE8	144402	ENSG00000139117	Early2	0.106725
7031_at	TFF1	7031	ENSG00000160182	Early1	0.0383689
646962_at	HRCT1	646962	ENSG00000196196	Early2	0.104864
9319_at	TRIP13	9319	ENSG00000071539	Early1	0.212776
229_at	ALDOB	229	ENSG00000136872	Late3	0.0303713
4321_at	MMP12	4321	ENSG00000110347	Late1	0.0953874
634_at	CEACAM1	634	ENSG00000079385	Early2	0.0983467
25928_at	SOSTDC1	25928	ENSG00000171243	Early2	0.101775
80117_at	ARL14	80117	ENSG00000179674	Early2	0.139236
1359_at	CPA3	1359	ENSG00000163751	Early3	0.0785767
9245_at	GCNT3	9245	ENSG00000140297	Early2	0.0889319
2651_at	GCNT2	2651	ENSG00000111846	Early2	0.125923
166968_at	MIER3	166968	ENSG00000155545	Early2	0.144181
116039_at	OSR2	116039	ENSG00000164920	Early1	0.0698564
23657_at	SLC7A11	23657	ENSG00000151012	Early1	0.106389
6817_at	SULT1A1	6817	ENSG00000196502	Early2	0.14367
5028_at	P2RY1	5028	ENSG00000169860	Early2	0.14564
57556_at	SEMA6A	57556	ENSG00000092421	Early2	0.152401
27163_at	NAAA	27163	ENSG00000138744	Early2	0.17467
10840_at	ALDH1L1	10840	ENSG00000144908	Early2	0.0331511
56938_at	ARNTL2	56938	ENSG00000029153	Early1	0.152687
339_at	APOBEC1	339	ENSG00000111701	Early1	0.0502423
2168_at	FABP1	2168	ENSG00000163586	Early2	0.0979122
23584_at	VSIG2	23584	ENSG00000019102	Early2	0.116206
6356_at	CCL11	6356	ENSG00000172156	Late2	0.0837016
9912_at	ARHGAP44	9912	ENSG00000006740	Early2	0.116099
80323_at	CCDC68	80323	ENSG00000166510	Early2	0.163527
443_at	ASPA	443	ENSG00000108381	Early2	0.109899
118471_at	PRAP1	118471	ENSG00000165828	Early2	0.0570935
7045_at	TGFBI	7045	ENSG00000120708	Early1	0.131364
7068_at	THRB	7068	ENSG00000151090	Early2	0.114479
27306_at	HPGDS	27306	ENSG00000163106	Early2	0.102098
4283_at	CXCL9	4283	ENSG00000138755	Late2	0.07659
8618_at	CADPS	8618	ENSG00000163618	Early1	0.0732596
56159_at	TEX11	56159	ENSG00000120498	Early2	0.147097
10457_at	GPNMB	10457	ENSG00000136235	Early3	0.0970156
994_at	CDC25B	994	ENSG00000101224	Early1	0.149772
11226_at	GALNT6	11226	ENSG00000139629	Early1	0.0765931
81035_at	COLEC12	81035	ENSG00000158270	Early3	0.0871496
3570_at	IL6R	3570	ENSG00000160712	Early2	0.108838
344887_at	LOC344887	344887	ENSG00000171658	Early2	0.122801
136895_at	C7orf31	136895	ENSG00000153790	Early2	0.139906
27283_at	TINAG	27283	ENSG00000137251	Early2	0.133692
6273_at	S100A2	6273	ENSG00000196754	Early1	0.120512
6387_at	CXCL12	6387	ENSG00000107562	Early2	0.0783081
2330_at	FMO5	2330	ENSG00000131781	Early2	0.147798
5332_at	PLCB4	5332	ENSG00000101333	Early1	0.0627804
25797_at	QPCT	25797	ENSG00000115828	Early1	0.0716286
54979_at	HRASLS2	54979	ENSG00000133328	Early2	0.104689
27286_at	SRPX2	27286	ENSG00000102359	Early1	0.0866348
9456_at	HOMER1	9456	ENSG00000152413	Early1	0.10747
57482_at	KIAA1211	57482	ENSG00000109265	Early2	0.130795
140828_at	LINC00261	140828	ENSG00000259974	Early2	0.0154528
23382_at	AHCYL2	23382	ENSG00000158467	Early2	0.155852
7058_at	THBS2	7058	ENSG00000186340	Late2	0.132939
25994_at	HIGD1A	25994	ENSG00000181061	Early2	0.179002
6398_at	SECTM1	6398	ENSG00000141574	Early2	0.102762
4982_at	TNFRSF11B	4982	ENSG00000164761	Early1	0.104742
5348_at	FXYD1	5348	ENSG00000266964	Early2	0.119088
6519_at	SLC3A1	6519	ENSG00000138079	Early2	0.0866281
3006_at	HIST1H1C	3006	ENSG00000187837	Early2	0.0718683
3485_at	IGFBP2	3485	ENSG00000115457	Early1	0.044341
9022_at	CLIC3	9022	ENSG00000169583	Early1	0.0653899
10581_at	IFITM2	10581	ENSG00000185201	Late1	0.125424
340542_at	BEX5	340542	ENSG00000184515	Early2	0.0272043
91353_at	IGLL3P	91353	NA	Early3	0.0659429
29953_at	TRHDE	29953	ENSG00000072657	Early2	0.111207
7498_at	XDH	7498	ENSG00000158125	Early2	0.111649
1672_at	DEFB1	1672	ENSG00000164825	Early2	0.0960406
8061_at	FOSL1	8061	ENSG00000175592	Early1	0.0983933
629_at	CFB	629	ENSG00000243649	Early1	0.0709805
1152_at	CKB	1152	ENSG00000166165	Early2	0.0756891
2012_at	EMP1	2012	ENSG00000134531	Early2	0.0768541
4306_at	NR3C2	4306	ENSG00000151623	Early2	0.170536
6943_at	TCF21	6943	ENSG00000118526	Early3	0.123795
5166_at	PDK4	5166	ENSG00000004799	Early2	0.100474
653_at	BMP5	653	ENSG00000112175	Early2	0.107786
957_at	ENTPD5	957	ENSG00000187097	Early2	0.186878
58530_at	LY6G6D	58530	ENSG00000244355	Early1	0.0755629
200916_at	RPL22L1	200916	ENSG00000163584	Early1	0.129839
5054_at	SERPINE1	5054	ENSG00000106366	Late1	0.131519
4332_at	MNDA	4332	ENSG00000163563	Late3	0.155203
3627_at	CXCL10	3627	ENSG00000169245	Late2	0.0974725
54829_at	ASPN	54829	ENSG00000106819	Late2	0.14779
6591_at	SNAI2	6591	ENSG00000019549	Late5	0.148234
124872_at	B4GALNT2	124872	ENSG00000167080	Early2	0.0741814
1356_at	CP	1356	ENSG00000047457	Early2	0.0896855
6505_at	SLC1A1	6505	ENSG00000106688	Early2	0.0918177
10529_at	NEBL	10529	ENSG00000078114	Early1	0.134482
6584_at	SLC22A5	6584	ENSG00000197375	Early2	0.181183
338557_at	FFAR4	338557	ENSG00000186188	Early2	0.0540485
25902_at	MTHFD1L	25902	ENSG00000120254	Early1	0.219654
54474_at	KRT20	54474	ENSG00000171431	Early2	0.0996618
1510_at	CTSE	1510	ENSG00000196188	Early2	0.0283548
147495_at	APCDD1	147495	ENSG00000154856	Early1	0.0697646
348_at	APOE	348	ENSG00000130203	Early3	0.107968
8399_at	PLA2G10	8399	ENSG00000069764	Early2	0.125894
2878_at	GPX3	2878	ENSG00000211445	Early3	0.0969024
55601_at	DDX60	55601	ENSG00000137628	Early2	0.113391
1958_at	EGR1	1958	ENSG00000120738	Early1	0.0593352
6999_at	TDO2	6999	ENSG00000151790	Late2	0.125015
64078_at	SLC28A3	64078	ENSG00000197506	Early1	0.0916795
84057_at	MND1	84057	ENSG00000121211	Early1	0.211523
727936_at	GXYLT2	727936	ENSG00000172986	Early3	0.0588262
1909_at	EDNRA	1909	ENSG00000151617	Late2	0.144667
57343_at	ZNF304	57343	ENSG00000131845	Early3	0.122331
306_at	ANXA3	306	ENSG00000138772	Early1	0.112541
150000_at	ABCC13	150000	ENSG00000243064	Early2	0.155525
3373_at	HYAL1	3373	ENSG00000114378	Early1	0.0527321
4147_at	MATN2	4147	ENSG00000132561	Early2	0.0968424
51454_at	GULP1	51454	ENSG00000144366	Early3	0.0818056
81831_at	NETO2	81831	ENSG00000171208	Early1	0.028216
134548_at	SOWAHA	134548	ENSG00000198944	Early2	0.141731
100505633_at	LOC100505633	100505633	ENSG00000224259	Early2	0.14232
5003_at	SLC22A18AS	5003	ENSG00000254827	Early2	0.156487
3434_at	IFIT1	3434	ENSG00000185745	Early3	0.0543364
54894_at	RNF43	54894	ENSG00000108375	Early1	0.081792
771_at	CA12	771	ENSG00000074410	Early2	0.115114
79153_at	GDPD3	79153	ENSG00000102886	Early2	0.124494
4640_at	MYO1A	4640	ENSG00000166866	Early2	0.158468
2681_at	GGTA1P	2681	ENSG00000204136	Early2	0.121191
5265_at	SERPINA1	5265	ENSG00000197249	Early1	0.0592297
4885_at	NPTX2	4885	ENSG00000106236	Late2	0.0946935
81493_at	SYNC	81493	ENSG00000162520	Early3	0.0802331
912_at	CD1D	912	ENSG00000158473	Early2	0.0860336
148808_at	MFSD4	148808	ENSG00000174514	Early2	0.0921782
1303_at	COL12A1	1303	ENSG00000111799	Late2	0.133071
1178_at	CLC	1178	ENSG00000105205	Early2	0.0553911
3002_at	GZMB	3002	ENSG00000100453	Late1	0.078657
5783_at	PTPN13	5783	ENSG00000163629	Early1	0.0921287
5009_at	OTC	5009	ENSG00000036473	Early2	0.0653857
8870_at	IER3	8870	ENSG00000137331	Late1	0.105097
57526_at	PCDH19	57526	ENSG00000165194	Early2	0.0840461
4128_at	MAOA	4128	ENSG00000189221	Early2	0.165305
25825_at	BACE2	25825	ENSG00000182240	Early1	0.0967024
10158_at	PDZK1IP1	10158	ENSG00000162366	Early1	0.0657923
6241_at	RRM2	6241	ENSG00000171848	Early1	0.178937
400643_at	LINC00668	400643	ENSG00000265933	Early1	0.0456704
55165_at	CEP55	55165	ENSG00000138180	Early1	0.200944
4239_at	MFAP4	4239	ENSG00000166482	Early3	0.11768
7474_at	WNT5A	7474	ENSG00000114251	Late1	0.104736
51776_at	ZAK	51776	ENSG00000091436	Early1	0.180119
284723_at	SLC25A34	284723	ENSG00000162461	Early2	0.164749
730_at	C7	730	ENSG00000112936	Early2	0.0858191
5764_at	PTN	5764	ENSG00000105894	Early2	0.0649966
9569_at	GTF2IRD1	9569	ENSG00000006704	Early1	0.157728
9058_at	SLC13A2	9058	ENSG00000007216	Early2	0.085391
4929_at	NR4A2	4929	ENSG00000153234	Early1	0.0758175
9966_at	TNFSF15	9966	ENSG00000181634	Early1	0.0911403
4151_at	MB	4151	ENSG00000198125	Early2	0.0776589
83540_at	NUF2	83540	ENSG00000143228	Early1	0.199855
5095_at	PCCA	5095	ENSG00000175198	Early1	0.0596545
5145_at	PDE6A	5145	ENSG00000132915	Early2	0.140413
3043_at	HBB	3043	ENSG00000244734	Early1	0.0469939
7594_at	ZNF43	7594	ENSG00000198521	Early2	0.0884358
11145_at	PLA2G16	11145	ENSG00000176485	Early1	0.0686318
57549_at	IGSF9	57549	ENSG00000085552	Early2	0.145836
7433_at	VIPR1	7433	ENSG00000114812	Early2	0.174685
5653_at	KLK6	5653	ENSG00000167755	Early1	0.0724242
389058_at	SP5	389058	ENSG00000204335	Early1	0.106466
5358_at	PLS3	5358	ENSG00000102024	Early1	0.124897
84133_at	ZNRF3	84133	ENSG00000183579	Early1	0.100061
6280_at	S100A9	6280	ENSG00000163220	Late3	0.147984
1282_at	COL4A1	1282	ENSG00000187498	Late2	0.137762
727897_at	MUC5B	727897	ENSG00000117983	Early2	0.0344
9787_at	DLGAP5	9787	ENSG00000126787	Early1	0.180937
124220_at	ZG16B	124220	ENSG00000162078	Early1	0.0526791
5152_at	PDE9A	5152	ENSG00000160191	Early2	0.119201
197257_at	LDHD	197257	ENSG00000166816	Early2	0.133076
2172_at	FABP6	2172	ENSG00000170231	Early1	0.0605275
5800_at	PTPRO	5800	ENSG00000151490	Early1	0.0309265
990_at	CDC6	990	ENSG00000094804	Early1	0.180862
54541_at	DDIT4	54541	ENSG00000168209	Late1	0.106982
339977_at	LRRC66	339977	ENSG00000188993	Early2	0.113253
6590_at	SLPI	6590	ENSG00000124107	Early1	0.0530212
7164_at	TPD52L1	7164	ENSG00000111907	Early1	0.0876865
55824_at	PAG1	55824	ENSG00000076641	Early2	0.105229
387763_at	C11orf96	387763	ENSG00000187479	Late2	0.161418
6583_at	SLC22A4	6583	ENSG00000197208	Early2	0.0611104
1306_at	COL15A1	1306	ENSG00000204291	Late2	0.172153
10917_at	BTNL3	10917	ENSG00000168903	Early2	0.170742
5794_at	PTPRH	5794	ENSG00000080031	Early2	0.168613
159296_at	NKX2-3	159296	ENSG00000119919	Early2	0.0800443
80235_at	PIGZ	80235	ENSG00000119227	Early2	0.119381
219972_at	MPEG1	219972	ENSG00000197629	Early3	0.146255
2049_at	EPHB3	2049	ENSG00000182580	Early1	0.114958
54852_at	PAQR5	54852	ENSG00000137819	Early2	0.106305
79783_at	C7orf10	79783	ENSG00000175600	Early2	0.0843677
30815_at	ST6GALNAC6	30815	ENSG00000160408	Early2	0.0872826
23302_at	WSCD1	23302	ENSG00000179314	Early2	0.161644
2537_at	IFI6	2537	ENSG00000126709	Early1	0.072474
59272_at	ACE2	59272	ENSG00000130234	Early2	0.0559892
3854_at	KRT6B	3854	ENSG00000185479	Early1	0.0836133
3075_at	CFH	3075	ENSG00000000971	Early3	0.114308
79801_at	SHCBP1	79801	ENSG00000171241	Early1	0.193141
1646_at	AKR1C2	1646	ENSG00000151632	Early2	0.0922845
65983_at	GRAMD3	65983	ENSG00000155324	Early2	0.168415
22824_at	HSPA4L	22824	ENSG00000164070	Early1	0.0824925
63924_at	CIDEC	63924	ENSG00000187288	Early2	0.0833881
7512_at	XPNPEP2	7512	ENSG00000122121	Early2	0.0700402
4084_at	MXD1	4084	ENSG00000059728	Early2	0.0700508
23596_at	OPN3	23596	ENSG00000054277	Early2	0.118864
51090_at	PLLP	51090	ENSG00000102934	Early1	0.0223885
6446_at	SGK1	6446	ENSG00000118515	Early3	0.0623709
389812_at	LCN15	389812	ENSG00000177984	Early1	0.0392366
55198_at	APPL2	55198	ENSG00000136044	Early2	0.174972
51083_at	GAL	51083	ENSG00000069482	Early1	0.10208
4199_at	ME1	4199	ENSG00000065833	Early1	0.084234
2205_at	FCER1A	2205	ENSG00000179639	Early2	0.0932347
25788_at	RAD54B	25788	ENSG00000197275	Early1	0.169922
2487_at	FRZB	2487	ENSG00000162998	Early2	0.0636055
718_at	C3	718	ENSG00000125730	Late2	0.103787
29070_at	CCDC113	29070	ENSG00000103021	Early1	0.123015
23563_at	CHST5	23563	ENSG00000135702	Early2	0.0752068
983_at	CDK1	983	ENSG00000170312	Early1	0.2153
54749_at	EPDR1	54749	ENSG00000086289	Early1	0.0441372
283537_at	SLC46A3	283537	ENSG00000139508	Early2	0.107551
79772_at	MCTP1	79772	ENSG00000175471	Late5	0.0959741
84624_at	FNDC1	84624	ENSG00000164694	Late2	0.142077
220134_at	SKA1	220134	ENSG00000154839	Early1	0.162038
7262_at	PHLDA2	7262	ENSG00000181649	Early1	0.0976062
79888_at	LPCAT1	79888	ENSG00000153395	Late1	0.101986
7098_at	TLR3	7098	ENSG00000164342	Early2	0.0982412
3579_at	CXCR2	3579	ENSG00000180871	Late3	0.142194
387695_at	C10orf99	387695	ENSG00000188373	Early2	0.0893585
8404_at	SPARCL1	8404	ENSG00000152583	Late5	0.130811
7447_at	VSNL1	7447	ENSG00000163032	Early1	0.1191
89958_at	SAPCD2	89958	ENSG00000186193	Early1	0.189419
10110_at	SGK2	10110	ENSG00000101049	Early2	0.139893
4085_at	MAD2L1	4085	ENSG00000164109	Early1	0.193486
26049_at	FAM169A	26049	ENSG00000198780	Early1	0.0620398
7004_at	TEAD4	7004	ENSG00000197905	Early1	0.193242
1894_at	ECT2	1894	ENSG00000114346	Early1	0.207819
8794_at	TNFRSF10C	8794	ENSG00000173535	Late1	0.0722505
4023_at	LPL	4023	ENSG00000175445	Early1	0.0789667
54825_at	CDHR2	54825	ENSG00000074276	Early2	0.115486
7205_at	TRIP6	7205	ENSG00000087077	Early1	0.0931319
6812_at	STXBP1	6812	ENSG00000136854	Early1	0.102828
960_at	CD44	960	ENSG00000026508	Early1	0.135642
3070_at	HELLS	3070	ENSG00000119969	Early1	0.189196
196527_at	ANO6	196527	ENSG00000177119	Early1	0.110009
85455_at	DISP2	85455	ENSG00000140323	Early2	0.116321
23228_at	PLCL2	23228	ENSG00000154822	Early2	0.13177
9881_at	TRANK1	9881	ENSG00000168016	Early2	0.160757
3624_at	INHBA	3624	ENSG00000122641	Late1	0.134898
55281_at	TMEM140	55281	ENSG00000146859	Early2	0.0708099
10317_at	B3GALT5	10317	ENSG00000183778	Early2	0.0837704
3820_at	KLRB1	3820	ENSG00000111796	Early2	0.0772667
6662_at	SOX9	6662	ENSG00000125398	Early1	0.120313
5697_at	PYY	5697	ENSG00000131096	Early2	0.121904
3001_at	GZMA	3001	ENSG00000145649	Early2	0.0558608
9493_at	KIF23	9493	ENSG00000137807	Early1	0.193765
22974_at	TPX2	22974	ENSG00000088325	Early1	0.17681
10590_at	SCGN	10590	ENSG00000079689	Early2	0.119966
357_at	SHROOM2	357	ENSG00000146950	Early2	0.0246894
27250_at	PDCD4	27250	ENSG00000150593	Early2	0.164769
2908_at	NR3C1	2908	ENSG00000113580	Early3	0.117093
1675_at	CFD	1675	ENSG00000197766	Early2	0.0895127
10112_at	KIF20A	10112	ENSG00000112984	Early1	0.175408
7850_at	IL1R2	7850	ENSG00000115590	Early2	0.0661007
183_at	AGT	183	ENSG00000135744	Early1	0.0725823
51237_at	MZB1	51237	ENSG00000170476	Early3	0.0728771
1503_at	CTPS1	1503	ENSG00000171793	Early1	0.166704
55872_at	PBK	55872	ENSG00000168078	Early1	0.161438
29923_at	HILPDA	29923	ENSG00000135245	Early1	0.145314
699_at	BUB1	699	ENSG00000169679	Early1	0.18177
366_at	AQP9	366	ENSG00000103569	Late3	0.142609
114876_at	OSBPL1A	114876	ENSG00000141447	Early2	0.0847071
146456_at	TMED6	146456	ENSG00000157315	Early2	0.067151
8507_at	ENC1	8507	ENSG00000171617	Early1	0.132773
3670_at	ISL1	3670	ENSG00000016082	Early2	0.0240247
222643_at	UNC5CL	222643	ENSG00000124602	Early1	0.0791467
6690_at	SPINK1	6690	ENSG00000164266	Early1	0.0419425
8611_at	PPAP2A	8611	ENSG00000067113	Early2	0.10648
3209_at	HOXA13	3209	ENSG00000106031	Early2	0.0451168
80022_at	MYO15B	80022	ENSG00000266714	Early2	0.146308
8549_at	LGR5	8549	ENSG00000139292	Early1	0.0724628
57460_at	PPM1H	57460	ENSG00000111110	Early1	0.140448
3859_at	KRT12	3859	ENSG00000187242	Early2	0.0973442
7358_at	UGDH	7358	ENSG00000109814	Early2	0.140315
11065_at	UBE2C	11065	ENSG00000175063	Early1	0.178399
84319_at	CMSS1	84319	ENSG00000184220	Early1	0.212187
90594_at	ZNF439	90594	ENSG00000171291	Early2	0.0944932
84706_at	GPT2	84706	ENSG00000166123	Early1	0.147449
56271_at	BEX4	56271	ENSG00000102409	Early3	0.107614
5352_at	PLOD2	5352	ENSG00000152952	Early3	0.0509157
3815_at	KIT	3815	ENSG00000157404	Early2	0.0775758
5168_at	ENPP2	5168	ENSG00000136960	Early3	0.100228
2767_at	GNA11	2767	ENSG00000088256	Early2	0.166342
10875_at	FGL2	10875	ENSG00000127951	Early3	0.125611
4033_at	LRMP	4033	ENSG00000118308	Early3	0.0760737
3706_at	ITPKA	3706	ENSG00000137825	Early2	0.13284
5950_at	RBP4	5950	ENSG00000138207	Early1	0.0456684
7123_at	CLEC3B	7123	ENSG00000163815	Early2	0.0788094
3855_at	KRT7	3855	ENSG00000135480	Early1	0.0808157
130340_at	AP1S3	130340	ENSG00000152056	Early1	0.114978
1466_at	CSRP2	1466	ENSG00000175183	Late2	0.15203
1522_at	CTSZ	1522	ENSG00000101160	Early2	0.0760815
10462_at	CLEC10A	10462	ENSG00000132514	Early2	0.123926
91316_at	GUSBP11	91316	ENSG00000228315	Early3	0.0664105
55790_at	CSGALNACT1	55790	ENSG00000147408	Early1	0.0850834
81610_at	FAM83D	81610	ENSG00000101447	Early1	0.192613
6352_at	CCL5	6352	ENSG00000161570	Early3	0.0973293
53405_at	CLIC5	53405	ENSG00000112782	Early2	0.149642
1562_at	CYP2C18	1562	ENSG00000108242	Early2	0.0699267
346389_at	MACC1	346389	ENSG00000183742	Early1	0.12252
8519_at	IFITM1	8519	ENSG00000185885	Early1	0.0826191
10891_at	PPARGC1A	10891	ENSG00000109819	Early2	0.15051
23461_at	ABCA5	23461	ENSG00000154265	Early2	0.141079
1051_at	CEBPB	1051	ENSG00000172216	Late1	0.138686
4211_at	MEIS1	4211	ENSG00000143995	Late2	0.126497
389432_at	SAMD5	389432	ENSG00000203727	Early1	0.0509274
5328_at	PLAU	5328	ENSG00000122861	Late3	0.156584
57405_at	SPC25	57405	ENSG00000152253	Early1	0.156702
9314_at	KLF4	9314	ENSG00000136826	Early2	0.120126
133_at	ADM	133	ENSG00000148926	Late3	0.095844
11320_at	MGAT4A	11320	ENSG00000071073	Early2	0.135722
25840_at	METTL7A	25840	ENSG00000185432	Early2	0.139474
5366_at	PMAIP1	5366	ENSG00000141682	Late1	0.110214
11156_at	PTP4A3	11156	ENSG00000184489	Early1	0.088568
10990_at	LILRB5	10990	ENSG00000105609	Early2	0.1018
100289255_at	LINC00675	100289255	ENSG00000263429	Early2	0.170626
6558_at	SLC12A2	6558	ENSG00000064651	Early1	0.11269
1193_at	CLIC2	1193	ENSG00000155962	Early3	0.130603
287_at	ANK2	287	ENSG00000145362	Early2	0.105925
3790_at	KCNS3	3790	ENSG00000170745	Early3	0.0450497
9928_at	KIF14	9928	ENSG00000118193	Early1	0.188631
80310_at	PDGFD	80310	ENSG00000170962	Early2	0.0907212
10309_at	CCNO	10309	ENSG00000152669	Early1	0.0994816
6549_at	SLC9A2	6549	ENSG00000115616	Early2	0.106183
23284_at	LPHN3	23284	ENSG00000150471	Early2	0.111085
9837_at	GINS1	9837	ENSG00000101003	Early1	0.178675
728_at	C5AR1	728	ENSG00000197405	Late3	0.146479
81575_at	APOLD1	81575	ENSG00000178878	Early1	0.0942313
54884_at	RETSAT	54884	ENSG00000042445	Early2	0.169426
54716_at	SLC6A20	54716	ENSG00000163817	Late1	0.056368
5918_at	RARRES1	5918	ENSG00000118849	Early2	0.0528841
1959_at	EGR2	1959	ENSG00000122877	Late1	0.0645507
55619_at	DOCK10	55619	ENSG00000135905	Early3	0.133464
3216_at	HOXB6	3216	ENSG00000108511	Early1	0.047149
126868_at	MAB21L3	126868	ENSG00000173212	Early2	0.0902928
1259_at	CNGA1	1259	ENSG00000198515	Early2	0.105291
3479_at	IGF1	3479	ENSG00000017427	Early2	0.111257
54210_at	TREM1	54210	ENSG00000124731	Late3	0.148149
51302_at	CYP39A1	51302	ENSG00000146233	Early1	0.0770216
79644_at	SRD5A3	79644	ENSG00000128039	Early1	0.067348
53827_at	FXYD5	53827	ENSG00000089327	Early1	0.112042
7941_at	PLA2G7	7941	ENSG00000146070	Late4	0.103134
8492_at	PRSS12	8492	ENSG00000164099	Early2	0.119926
788_at	SLC25A20	788	ENSG00000178537	Early2	0.138855
10903_at	MTMR11	10903	ENSG00000014914	Early2	0.127111
1111_at	CHEK1	1111	ENSG00000149554	Early1	0.215017
5723_at	PSPH	5723	ENSG00000146733	Early1	0.14938
5906_at	RAP1A	5906	ENSG00000116473	Early2	0.0546754
152831_at	KLB	152831	ENSG00000134962	Early2	0.155365
80221_at	ACSF2	80221	ENSG00000167107	Early2	0.124277
150_at	ADRA2A	150	ENSG00000150594	Early2	0.0815615
7412_at	VCAM1	7412	ENSG00000162692	Late5	0.133828
725_at	C4BPB	725	ENSG00000123843	Early1	0.07484
26504_at	CNNM4	26504	ENSG00000158158	Early2	0.176364
79075_at	DSCC1	79075	ENSG00000136982	Early1	0.188472
85460_at	ZNF518B	85460	ENSG00000178163	Early3	0.0643746
151393_at	RMDN2	151393	ENSG00000115841	Early2	0.161922
2030_at	SLC29A1	2030	ENSG00000112759	Early1	0.169915
4601_at	MXI1	4601	ENSG00000119950	Early2	0.131008
57761_at	TRIB3	57761	ENSG00000101255	Early1	0.107072
23213_at	SULF1	23213	ENSG00000137573	Late2	0.136097
2357_at	FPR1	2357	ENSG00000171051	Late3	0.150599
58480_at	RHOU	58480	ENSG00000116574	Early2	0.11776
4233_at	MET	4233	ENSG00000105976	Early1	0.116006
2281_at	FKBP1B	2281	ENSG00000119782	Early2	0.0936063
143872_at	ARHGAP42	143872	ENSG00000165895	Early2	0.116367
3119_at	HLA-DQB1	3119	ENSG00000179344	Early3	0.0768647
11072_at	DUSP14	11072	ENSG00000161326	Early1	0.16758
248_at	ALPI	248	ENSG00000163295	Early2	0.123226
7976_at	FZD3	7976	ENSG00000104290	Early1	0.111789
4038_at	LRP4	4038	ENSG00000134569	Early2	0.0334635
5629_at	PROX1	5629	ENSG00000117707	Early1	0.090782
7360_at	UGP2	7360	ENSG00000169764	Early2	0.182084
5577_at	PRKAR2B	5577	ENSG00000005249	Early3	0.0993286
112399_at	EGLN3	112399	ENSG00000129521	Early2	0.0685652
112609_at	MRAP2	112609	ENSG00000135324	Early2	0.0236248
54762_at	GRAMD1C	54762	ENSG00000178075	Early2	0.109253
3400_at	ID4	3400	ENSG00000172201	Early1	0.0516752
4256_at	MGP	4256	ENSG00000111341	Late2	0.157869
375061_at	FAM89A	375061	ENSG00000182118	Early1	0.137943
84306_at	PDCD2L	84306	ENSG00000126249	Early1	0.194956
2219_at	FCN1	2219	ENSG00000085265	Late3	0.120379
1803_at	DPP4	1803	ENSG00000197635	Early2	0.056731
387103_at	CENPW	387103	ENSG00000203760	Early1	0.173908
5523_at	PPP2R3A	5523	ENSG00000073711	Early2	0.146093
51816_at	CECR1	51816	ENSG00000093072	Early3	0.117251
284346_at	ZNF575	284346	ENSG00000176472	Early2	0.147975
58494_at	JAM2	58494	ENSG00000154721	Early3	0.123715
8553_at	BHLHE40	8553	ENSG00000134107	Late1	0.0865868
712_at	C1QA	712	ENSG00000173372	Early3	0.1231
2857_at	GPR34	2857	ENSG00000171659	Early2	0.0765686
145270_at	PRIMA1	145270	ENSG00000175785	Early2	0.124656
93099_at	DMKN	93099	ENSG00000161249	Early1	0.0596178
80168_at	MOGAT2	80168	ENSG00000166391	Early2	0.150089
57216_at	VANGL2	57216	ENSG00000162738	Early2	0.017585
388610_at	TRNP1	388610	ENSG00000253368	Early1	0.0617336
3676_at	ITGA4	3676	ENSG00000115232	Early3	0.102642
6535_at	SLC6A8	6535	ENSG00000130821	Early2	0.069801
2180_at	ACSL1	2180	ENSG00000151726	Late3	0.086178
6781_at	STC1	6781	ENSG00000159167	Late1	0.115303
5450_at	POU2AF1	5450	ENSG00000110777	Early3	0.0677904
3017_at	HIST1H2BD	3017	ENSG00000158373	Early2	0.079558
83604_at	TMEM47	83604	ENSG00000147027	Late2	0.131597
29028_at	ATAD2	29028	ENSG00000156802	Early1	0.207809
388796_at	SNHG17	388796	ENSG00000196756	Early1	0.108481
23767_at	FLRT3	23767	ENSG00000125848	Early1	0.0235926
7272_at	TTK	7272	ENSG00000112742	Early1	0.171749
54102_at	CLIC6	54102	ENSG00000159212	Early2	0.0432013
130399_at	ACVR1C	130399	ENSG00000123612	Early2	0.0904919
80150_at	ASRGL1	80150	ENSG00000162174	Early1	0.0574947
79686_at	LINC00341	79686	ENSG00000229645	Early3	0.0970081
6691_at	SPINK2	6691	ENSG00000128040	Early2	0.103801
5730_at	PTGDS	5730	ENSG00000107317	Early3	0.0637619
9934_at	P2RY14	9934	ENSG00000174944	Early3	0.0923306
4069_at	LYZ	4069	ENSG00000090382	Early1	0.0598598
93010_at	B3GNT7	93010	ENSG00000156966	Early2	0.0772645
55640_at	FLVCR2	55640	ENSG00000119686	Early2	0.134398
10753_at	CAPN9	10753	ENSG00000135773	Early2	0.0770136
675_at	BRCA2	675	ENSG00000139618	Early1	0.18043
92211_at	CDHR1	92211	ENSG00000148600	Early2	0.0529326
5567_at	PRKACB	5567	ENSG00000142875	Early2	0.115253
8318_at	CDC45	8318	ENSG00000093009	Early1	0.169159
120376_at	COLCA2	120376	ENSG00000214290	Early2	0.0308814
10085_at	EDIL3	10085	ENSG00000164176	Early2	0.0827093
4501_at	MT1X	4501	ENSG00000187193	Early2	0.0650817
713_at	C1QB	713	ENSG00000173369	Early3	0.115436
6695_at	SPOCK1	6695	ENSG00000152377	Late2	0.153017
6369_at	CCL24	6369	ENSG00000106178	Early1	0.0890834
282679_at	AQP11	282679	ENSG00000178301	Early2	0.10243
1839_at	HBEGF	1839	ENSG00000113070	Late1	0.0685247
79782_at	LRRC31	79782	ENSG00000114248	Early2	0.11319
27284_at	SULT1B1	27284	ENSG00000173597	Early2	0.109999
57823_at	SLAMF7	57823	ENSG00000026751	Early3	0.107735
4585_at	MUC4	4585	ENSG00000145113	Early2	0.0676522
90293_at	KLHL13	90293	ENSG00000003096	Early2	0.0473398
23639_at	LRRC6	23639	ENSG00000129295	Early1	0.080992
891_at	CCNB1	891	ENSG00000134057	Early1	0.183771
1181_at	CLCN2	1181	ENSG00000114859	Early2	0.125202
4208_at	MEF2C	4208	ENSG00000081189	Early3	0.125169
5920_at	RARRES3	5920	ENSG00000133321	Early2	0.0563257
91947_at	ARRDC4	91947	ENSG00000140450	Early2	0.126397
65982_at	ZSCAN18	65982	ENSG00000121413	Early3	0.0740424
79850_at	FAM57A	79850	ENSG00000167695	Early1	0.115565
440145_at	MZT1	440145	ENSG00000204899	Early1	0.199284
10417_at	SPON2	10417	ENSG00000159674	Late2	0.174186
6282_at	S100A11	6282	ENSG00000163191	Early1	0.145985
8638_at	OASL	8638	ENSG00000135114	Early2	0.055223
22795_at	NID2	22795	ENSG00000087303	Late1	0.0808057
100130933_at	SMIM6	100130933	ENSG00000259120	Early2	0.151031
6484_at	ST3GAL4	6484	ENSG00000110080	Early2	0.0284615
84888_at	SPPL2A	84888	ENSG00000138600	Early2	0.145706
84953_at	MICALCL	84953	ENSG00000133808	Early2	0.104437
6422_at	SFRP1	6422	ENSG00000104332	Early2	0.0807607
2517_at	FUCA1	2517	ENSG00000179163	Early2	0.154517
4318_at	MMP9	4318	ENSG00000100985	Late1	0.0993909
3512_at	IGJ	3512	ENSG00000132465	Early2	0.0729167
79695_at	GALNT12	79695	ENSG00000119514	Early2	0.118806
4830_at	NME1	4830	ENSG00000239672	Early1	0.206955
7436_at	VLDLR	7436	ENSG00000147852	Early2	0.0664381
2532_at	DARC	2532	ENSG00000213088	Early3	0.0711867
1236_at	CCR7	1236	ENSG00000126353	Late4	0.0945567
23594_at	ORC6	23594	ENSG00000091651	Early1	0.178944
79583_at	TMEM231	79583	ENSG00000205084	Early1	0.0922875
4692_at	NDN	4692	ENSG00000182636	Late5	0.103061
2053_at	EPHX2	2053	ENSG00000120915	Early2	0.112909
84649_at	DGAT2	84649	ENSG00000062282	Early1	0.117181
150468_at	CKAP2L	150468	ENSG00000169607	Early1	0.181192
54463_at	FAM134B	54463	ENSG00000154153	Early2	0.090061
342035_at	GLDN	342035	ENSG00000186417	Early2	0.0584032
6319_at	SCD	6319	ENSG00000099194	Early1	0.0954623
2124_at	EVI2B	2124	ENSG00000185862	Early3	0.100561
5349_at	FXYD3	5349	ENSG00000089356	Early2	0.12354
6347_at	CCL2	6347	ENSG00000108691	Late2	0.157867
1602_at	DACH1	1602	ENSG00000165659	Early1	0.103889
57415_at	C3orf14	57415	ENSG00000114405	Late4	0.0448697
705_at	BYSL	705	ENSG00000112578	Early1	0.229767
7153_at	TOP2A	7153	ENSG00000131747	Early1	0.187236
4837_at	NNMT	4837	ENSG00000166741	Late2	0.148614
10231_at	RCAN2	10231	ENSG00000172348	Early2	0.0733641
153579_at	BTNL9	153579	ENSG00000165810	Early1	0.079982
346606_at	MOGAT3	346606	ENSG00000106384	Early2	0.0878641
10370_at	CITED2	10370	ENSG00000164442	Early2	0.11009
2110_at	ETFDH	2110	ENSG00000171503	Early2	0.152685
29089_at	UBE2T	29089	ENSG00000077152	Early1	0.198439
1308_at	COL17A1	1308	ENSG00000065618	Early2	0.0804136
55620_at	STAP2	55620	ENSG00000178078	Early2	0.166626
57530_at	CGN	57530	ENSG00000143375	Early2	0.169345
92745_at	SLC38A5	92745	ENSG00000017483	Early1	0.111889
4071_at	TM4SF1	4071	ENSG00000169908	Early1	0.0736247
79148_at	MMP28	79148	ENSG00000129270	Early2	0.139698
54492_at	NEURL1B	54492	ENSG00000214357	Early2	0.0889251
151473_at	SLC16A14	151473	ENSG00000163053	Early1	0.0360207
35_at	ACADS	35	ENSG00000122971	Early2	0.182799
25849_at	PARM1	25849	ENSG00000169116	Early2	0.0893824
1902_at	LPAR1	1902	ENSG00000198121	Early3	0.10862
58475_at	MS4A7	58475	ENSG00000166927	Early3	0.116806
26579_at	MYEOV	26579	ENSG00000172927	Early1	0.0892548
149466_at	C1orf210	149466	ENSG00000253313	Early2	0.14453
9588_at	PRDX6	9588	ENSG00000117592	Early2	0.115696
1490_at	CTGF	1490	ENSG00000118523	Late1	0.0920795
80760_at	ITIH5	80760	ENSG00000123243	Early3	0.097088
10261_at	IGSF6	10261	ENSG00000140749	Late4	0.13993
150209_at	AIFM3	150209	ENSG00000183773	Early2	0.0762487
347902_at	AMIGO2	347902	ENSG00000139211	Early1	0.0637933
145837_at	LOC145837	145837	ENSG00000245750	Early2	0.0640888
11326_at	VSIG4	11326	ENSG00000155659	Early3	0.0840862
6515_at	SLC2A3	6515	ENSG00000059804	Late3	0.162229
714_at	C1QC	714	ENSG00000159189	Early3	0.124437
54097_at	FAM3B	54097	ENSG00000183844	Late1	0.0328164
114818_at	KLHL29	114818	ENSG00000119771	Early1	0.0914735
100505865_at	LINC00920	100505865	ENSG00000246898	Early1	0.0827831
7032_at	TFF2	7032	ENSG00000160181	Early1	0.047677
729230_at	CCR2	729230	ENSG00000121807	Early3	0.111413
51088_at	KLHL5	51088	ENSG00000109790	Late2	0.175008
1728_at	NQO1	1728	ENSG00000181019	Early1	0.0745523
2628_at	GATM	2628	ENSG00000171766	Early2	0.0782549
2150_at	F2RL1	2150	ENSG00000164251	Early2	0.128989
6648_at	SOD2	6648	ENSG00000112096	Late3	0.14157
57699_at	CPNE5	57699	ENSG00000124772	Early3	0.0885105
5169_at	ENPP3	5169	ENSG00000154269	Early2	0.0749154
1033_at	CDKN3	1033	ENSG00000100526	Early1	0.181406
1434_at	CSE1L	1434	ENSG00000124207	Early1	0.214117
10535_at	RNASEH2A	10535	ENSG00000104889	Early1	0.215033
727910_at	TLCD2	727910	ENSG00000185561	Early2	0.150955
115207_at	KCTD12	115207	ENSG00000178695	Early3	0.0589296
200958_at	MUC20	200958	ENSG00000176945	Early2	0.0633895
6624_at	FSCN1	6624	ENSG00000075618	Early1	0.0735699
9156_at	EXO1	9156	ENSG00000174371	Early1	0.167053
283070_at	LOC283070	283070	NA	Early2	0.0856959
3170_at	FOXA2	3170	ENSG00000125798	Early1	0.0731585
890_at	CCNA2	890	ENSG00000145386	Early1	0.170359
4237_at	MFAP2	4237	ENSG00000117122	Late1	0.114492
401494_at	PTPLAD2	401494	ENSG00000188921	Early3	0.112931
55010_at	PARPBP	55010	ENSG00000185480	Early1	0.19614
4821_at	NKX2-2	4821	ENSG00000125820	Early2	0.0634706
124976_at	SPNS2	124976	ENSG00000183018	Early1	0.086052
257019_at	FRMD3	257019	ENSG00000172159	Early2	0.0857071
2769_at	GNA15	2769	ENSG00000060558	Early1	0.0775507
3371_at	TNC	3371	ENSG00000041982	Late2	0.150941
10223_at	GPA33	10223	ENSG00000143167	Early2	0.129923
2633_at	GBP1	2633	ENSG00000117228	Late3	0.0867689
80149_at	ZC3H12A	80149	ENSG00000163874	Early1	0.0759204
1058_at	CENPA	1058	ENSG00000115163	Early1	0.188913
4869_at	NPM1	4869	ENSG00000181163	Early1	0.18649
3945_at	LDHB	3945	ENSG00000111716	Early1	0.107515
339665_at	SLC35E4	339665	ENSG00000100036	Early1	0.0800067
2263_at	FGFR2	2263	ENSG00000066468	Early2	0.104252
64094_at	SMOC2	64094	ENSG00000112562	Late5	0.0663845
2202_at	EFEMP1	2202	ENSG00000115380	Late5	0.114681
2123_at	EVI2A	2123	ENSG00000126860	Late4	0.151558
23158_at	TBC1D9	23158	ENSG00000109436	Early3	0.103274
4638_at	MYLK	4638	ENSG00000065534	Late5	0.113179
124975_at	GGT6	124975	ENSG00000167741	Early2	0.141047
92241_at	RCSD1	92241	ENSG00000198771	Early3	0.143537
10815_at	CPLX1	10815	ENSG00000168993	Early1	0.0615828
4953_at	ODC1	4953	ENSG00000115758	Early1	0.171018
195828_at	ZNF367	195828	ENSG00000165244	Early1	0.176352
929_at	CD14	929	ENSG00000170458	Late4	0.11028
201895_at	SMIM14	201895	ENSG00000163683	Early2	0.119272
9452_at	ITM2A	9452	ENSG00000078596	Early3	0.0757917
113115_at	MTFR2	113115	ENSG00000146410	Early1	0.188182
168537_at	GIMAP7	168537	ENSG00000179144	Early3	0.116295
80131_at	LRRC8E	80131	ENSG00000171017	Early1	0.120256
6713_at	SQLE	6713	ENSG00000104549	Early1	0.0917036
124961_at	ZFP3	124961	ENSG00000180787	Early2	0.105571
643008_at	SMIM5	643008	ENSG00000204323	Early2	0.145326
2329_at	FMO4	2329	ENSG00000076258	Early2	0.165336
6641_at	SNTB1	6641	ENSG00000172164	Early1	0.121662
651_at	BMP3	651	ENSG00000152785	Early2	0.125318
80183_at	KIAA0226L	80183	ENSG00000102445	Early1	0.0760931
8988_at	HSPB3	8988	ENSG00000169271	Early2	0.061415
595_at	CCND1	595	ENSG00000110092	Early1	0.113642
64699_at	TMPRSS3	64699	ENSG00000160183	Early1	0.0920109
152007_at	GLIPR2	152007	ENSG00000122694	Early3	0.0786187
51_at	ACOX1	51	ENSG00000161533	Early2	0.166757
6717_at	SRI	6717	ENSG00000075142	Early2	0.165559
23764_at	MAFF	23764	ENSG00000185022	Late1	0.0731036
285_at	ANGPT2	285	ENSG00000091879	Late1	0.12794
2213_at	FCGR2B	2213	ENSG00000072694	Late4	0.107811
722_at	C4BPA	722	ENSG00000123838	Early1	0.0663285
55732_at	C1orf112	55732	ENSG00000000460	Early1	0.183111
1824_at	DSC2	1824	ENSG00000134755	Early2	0.145123
332_at	BIRC5	332	ENSG00000089685	Early1	0.188102
973_at	CD79A	973	ENSG00000105369	Early3	0.0951446
137835_at	TMEM71	137835	ENSG00000165071	Early1	0.0677867
4129_at	MAOB	4129	ENSG00000069535	Early2	0.0582969
5142_at	PDE4B	5142	ENSG00000184588	Late3	0.105953
2635_at	GBP3	2635	ENSG00000117226	Early2	0.0604311
129607_at	CMPK2	129607	ENSG00000134326	Early2	0.0571045
51330_at	TNFRSF12A	51330	ENSG00000006327	Early1	0.10712
1439_at	CSF2RB	1439	ENSG00000100368	Late4	0.159319
7378_at	UPP1	7378	ENSG00000183696	Early3	0.0465201
55897_at	MESP1	55897	ENSG00000166823	Early2	0.0689595
55388_at	MCM10	55388	ENSG00000065328	Early1	0.185487
54504_at	CPVL	54504	ENSG00000106066	Early3	0.102458
26_at	AOC1	26	ENSG00000002726	Early2	0.130297
51338_at	MS4A4A	51338	ENSG00000110079	Early3	0.112027
158471_at	PRUNE2	158471	ENSG00000106772	Early1	0.0408113
5507_at	PPP1R3C	5507	ENSG00000119938	Late5	0.0965831
64151_at	NCAPG	64151	ENSG00000109805	Early1	0.1743
9332_at	CD163	9332	ENSG00000177575	Late5	0.115583
8614_at	STC2	8614	ENSG00000113739	Early1	0.0928894
23475_at	QPRT	23475	ENSG00000103485	Early2	0.0172727
23052_at	ENDOD1	23052	ENSG00000149218	Early2	0.14442
3673_at	ITGA2	3673	ENSG00000164171	Early1	0.131595
9982_at	FGFBP1	9982	ENSG00000137440	Early2	0.0488004
9834_at	KIAA0125	9834	ENSG00000226777	Early3	0.0796245
65055_at	REEP1	65055	ENSG00000068615	Early1	0.0406162
23474_at	ETHE1	23474	ENSG00000105755	Early2	0.140977
1277_at	COL1A1	1277	ENSG00000108821	Late2	0.150376
4751_at	NEK2	4751	ENSG00000117650	Early1	0.168064
27346_at	TMEM97	27346	ENSG00000109084	Early1	0.15868
64105_at	CENPK	64105	ENSG00000123219	Early1	0.155792
7188_at	TRAF5	7188	ENSG00000082512	Early1	0.117423
10797_at	MTHFD2	10797	ENSG00000065911	Early1	0.186929
23266_at	LPHN2	23266	ENSG00000117114	Late2	0.14508
10974_at	ADIRF	10974	ENSG00000148671	Early2	0.0574208
407975_at	MIR17HG	407975	ENSG00000215417	Early1	0.10743
660_at	BMX	660	ENSG00000102010	Early2	0.066391
10669_at	CGREF1	10669	ENSG00000138028	Early1	0.10837
2192_at	FBLN1	2192	ENSG00000077942	Late5	0.122616
10635_at	RAD51AP1	10635	ENSG00000111247	Early1	0.1901
6926_at	TBX3	6926	ENSG00000135111	Early1	0.0640984
3161_at	HMMR	3161	ENSG00000072571	Early1	0.150163
284076_at	TTLL6	284076	ENSG00000170703	Early2	0.111545
3486_at	IGFBP3	3486	ENSG00000146674	Late5	0.0967692
1278_at	COL1A2	1278	ENSG00000164692	Late2	0.166052
81618_at	ITM2C	81618	ENSG00000135916	Early2	0.136422
2305_at	FOXM1	2305	ENSG00000111206	Early1	0.163877
7070_at	THY1	7070	ENSG00000154096	Late2	0.168295
1969_at	EPHA2	1969	ENSG00000142627	Early1	0.0778501
9368_at	SLC9A3R1	9368	ENSG00000109062	Early2	0.118342
10142_at	AKAP9	10142	ENSG00000127914	Early2	0.155633
939_at	CD27	939	ENSG00000139193	Early3	0.100325
253264_at	ZNF503-AS1	253264	ENSG00000226051	Early2	0.0407592
9212_at	AURKB	9212	ENSG00000178999	Early1	0.165636
55359_at	STYK1	55359	ENSG00000060140	Early2	0.122755
9055_at	PRC1	9055	ENSG00000198901	Early1	0.175807
134728_at	IRAK1BP1	134728	ENSG00000146243	Early1	0.0980818
83879_at	CDCA7	83879	ENSG00000144354	Early1	0.134384
135112_at	NCOA7	135112	ENSG00000111912	Early1	0.108035
8434_at	RECK	8434	ENSG00000122707	Late5	0.145575
6299_at	SALL1	6299	ENSG00000103449	Early3	0.0745596
2530_at	FUT8	2530	ENSG00000033170	Early1	0.10282
121506_at	ERP27	121506	ENSG00000139055	Early1	0.0648777
54809_at	SAMD9	54809	ENSG00000205413	Early2	0.0821652
84798_at	C19orf48	84798	ENSG00000167747	Early1	0.178432
1960_at	EGR3	1960	ENSG00000179388	Late1	0.0744407
55554_at	KLK15	55554	ENSG00000174562	Early2	0.0561247
58473_at	PLEKHB1	58473	ENSG00000021300	Early1	0.0688404
29841_at	GRHL1	29841	ENSG00000134317	Early1	0.0995912
3614_at	IMPDH1	3614	ENSG00000106348	Early1	0.142425
57181_at	SLC39A10	57181	ENSG00000196950	Early1	0.152456
79083_at	MLPH	79083	ENSG00000115648	Early2	0.0233103
30812_at	SOX8	30812	ENSG00000005513	Early2	0.0358618
26040_at	SETBP1	26040	ENSG00000152217	Early3	0.100406
54509_at	RHOF	54509	ENSG00000139725	Early2	0.0690342
4688_at	NCF2	4688	ENSG00000116701	Late3	0.154852
9865_at	TRIL	9865	NA	Early3	0.0576903
6790_at	AURKA	6790	ENSG00000087586	Early1	0.163061
116496_at	FAM129A	116496	ENSG00000135842	Late4	0.151131
283897_at	C16orf54	283897	ENSG00000185905	Early3	0.064778
29974_at	A1CF	29974	ENSG00000148584	Early2	0.117961
2273_at	FHL1	2273	ENSG00000022267	Early3	0.0999577
347853_at	TBX10	347853	ENSG00000167800	Early2	0.0907452
84102_at	SLC41A2	84102	ENSG00000136052	Early2	0.118026
5427_at	POLE2	5427	ENSG00000100479	Early1	0.167083
8516_at	ITGA8	8516	ENSG00000077943	Early2	0.0747932
80336_at	PABPC1L	80336	ENSG00000101104	Early1	0.0886464
245972_at	ATP6V0D2	245972	ENSG00000147614	Early2	0.0839917
29127_at	RACGAP1	29127	ENSG00000161800	Early1	0.207281
54805_at	CNNM2	54805	ENSG00000148842	Early2	0.139356
1634_at	DCN	1634	ENSG00000011465	Late2	0.171784
388581_at	FAM132A	388581	ENSG00000184163	Early2	0.121261
2971_at	GTF3A	2971	ENSG00000122034	Early1	0.158109
84419_at	C15orf48	84419	ENSG00000166920	Early2	0.0925378
8875_at	VNN2	8875	ENSG00000112303	Late3	0.150943
5947_at	RBP1	5947	ENSG00000114115	Late5	0.0796647
4363_at	ABCC1	4363	ENSG00000103222	Early1	0.158212
9060_at	PAPSS2	9060	ENSG00000198682	Early2	0.119315
10098_at	TSPAN5	10098	ENSG00000168785	Early1	0.0927135
23322_at	RPGRIP1L	23322	ENSG00000103494	Early1	0.168521
18_at	ABAT	18	ENSG00000183044	Early2	0.0711738
5396_at	PRRX1	5396	ENSG00000116132	Late1	0.120027
6366_at	CCL21	6366	ENSG00000137077	Early3	0.0766999
57670_at	KIAA1549	57670	ENSG00000122778	Early1	0.134938
5655_at	KLK10	5655	ENSG00000129451	Early1	0.0714704
10103_at	TSPAN1	10103	ENSG00000117472	Early2	0.118737
118932_at	ANKRD22	118932	ENSG00000152766	Early1	0.100703
3003_at	GZMK	3003	ENSG00000113088	Early3	0.0858933
54962_at	TIPIN	54962	ENSG00000075131	Early1	0.163764
2824_at	GPM6B	2824	ENSG00000046653	Early3	0.0776557
29899_at	GPSM2	29899	ENSG00000121957	Early1	0.137848
55227_at	LRRC1	55227	ENSG00000137269	Early2	0.120378
8529_at	CYP4F2	8529	ENSG00000186115	Early2	0.0453524
12_at	SERPINA3	12	ENSG00000196136	Early1	0.0539396
55902_at	ACSS2	55902	ENSG00000131069	Early2	0.153638
64921_at	CASD1	64921	ENSG00000127995	Early2	0.109529
2_at	A2M	2	ENSG00000175899	Early3	0.0981907
54517_at	PUS7	54517	ENSG00000091127	Early1	0.17852
493869_at	GPX8	493869	ENSG00000164294	Late1	0.0971732
3202_at	HOXA5	3202	ENSG00000106004	Early2	0.0699693
9099_at	USP2	9099	ENSG00000036672	Early2	0.137838
51514_at	DTL	51514	ENSG00000143476	Early1	0.15726
2040_at	STOM	2040	ENSG00000148175	Late2	0.13329
59353_at	TMEM35	59353	ENSG00000126950	Early2	0.0621956
1293_at	COL6A3	1293	ENSG00000163359	Late2	0.15663
7852_at	CXCR4	7852	ENSG00000121966	Late3	0.0910597
11126_at	CD160	11126	ENSG00000117281	Early2	0.102752
9833_at	MELK	9833	ENSG00000165304	Early1	0.183031
1290_at	COL5A2	1290	ENSG00000204262	Late2	0.181369
26586_at	CKAP2	26586	ENSG00000136108	Early1	0.199644
5983_at	RFC3	5983	ENSG00000133119	Early1	0.194088
6296_at	ACSM3	6296	ENSG00000005187	Early2	0.0702829
6091_at	ROBO1	6091	ENSG00000169855	Late2	0.133437
3113_at	HLA-DPA1	3113	ENSG00000231389	Early3	0.132589
317649_at	EIF4E3	317649	ENSG00000163412	Early2	0.125889
148534_at	TMEM56	148534	ENSG00000152078	Early2	0.098604
3667_at	IRS1	3667	ENSG00000169047	Early1	0.0477713
5919_at	RARRES2	5919	ENSG00000106538	Late5	0.108399
6447_at	SCG5	6447	ENSG00000166922	Early1	0.0292305
10082_at	GPC6	10082	ENSG00000183098	Late5	0.148589
85409_at	NKD2	85409	ENSG00000145506	Early1	0.0893191
100507246_at	SNHG16	100507246	ENSG00000163597	Early1	0.15006
2359_at	FPR3	2359	ENSG00000187474	Early3	0.0992363
3037_at	HAS2	3037	ENSG00000170961	Late2	0.0923203
441951_at	ZFAS1	441951	ENSG00000177410	Early1	0.118134
2877_at	GPX2	2877	ENSG00000176153	Early1	0.100753
10346_at	TRIM22	10346	ENSG00000132274	Early1	0.0317464
54892_at	NCAPG2	54892	ENSG00000146918	Early1	0.197567
84981_at	MIR22HG	84981	ENSG00000186594	Early2	0.0747779
6523_at	SLC5A1	6523	ENSG00000100170	Early1	0.0529573
3123_at	HLA-DRB1	3123	ENSG00000196126	Early3	0.087877
388341_at	FAM211A	388341	ENSG00000181350	Early2	0.172254
10131_at	TRAP1	10131	ENSG00000126602	Early1	0.204583
4171_at	MCM2	4171	ENSG00000073111	Early1	0.17746
23180_at	RFTN1	23180	ENSG00000131378	Late2	0.176121
6414_at	SEPP1	6414	ENSG00000250722	Early2	0.116179
57026_at	PDXP	57026	ENSG00000241360	Early2	0.0961688
301_at	ANXA1	301	ENSG00000135046	Late1	0.0724711
10008_at	KCNE3	10008	ENSG00000175538	Early1	0.0933884
84647_at	PLA2G12B	84647	ENSG00000138308	Early2	0.0647607
3684_at	ITGAM	3684	ENSG00000169896	Late4	0.128643
4311_at	MME	4311	ENSG00000196549	Late1	0.0739982
255738_at	PCSK9	255738	ENSG00000169174	Early1	0.0953461
253039_at	PSMD5-AS1	253039	ENSG00000226752	Early1	0.0306117
768_at	CA9	768	ENSG00000107159	Early1	0.0770678
10630_at	PDPN	10630	ENSG00000162493	Late2	0.162217
51050_at	PI15	51050	ENSG00000137558	Late2	0.138479
9015_at	TAF1A	9015	ENSG00000143498	Early1	0.151094
24137_at	KIF4A	24137	ENSG00000090889	Early1	0.171204
2770_at	GNAI1	2770	ENSG00000127955	Early3	0.0499779
66002_at	CYP4F12	66002	ENSG00000186204	Early2	0.143355
875_at	CBS	875	ENSG00000160200	Early2	0.0568661
55789_at	DEPDC1B	55789	ENSG00000035499	Early1	0.152281
3714_at	JAG2	3714	ENSG00000184916	Early1	0.12259
55215_at	FANCI	55215	ENSG00000140525	Early1	0.198458
55225_at	RAVER2	55225	ENSG00000162437	Early2	0.16204
23708_at	GSPT2	23708	ENSG00000189369	Early1	0.0342459
51567_at	TDP2	51567	ENSG00000111802	Early2	0.13962
113130_at	CDCA5	113130	ENSG00000146670	Early1	0.185473
341_at	APOC1	341	ENSG00000130208	Early3	0.0725521
55612_at	FERMT1	55612	ENSG00000101311	Early1	0.0950902
6609_at	SMPD1	6609	ENSG00000166311	Early2	0.131145
2495_at	FTH1	2495	ENSG00000167996	Early2	0.0843226
2306_at	FOXD2	2306	ENSG00000186564	Early2	0.0841494
10004_at	NAALADL1	10004	ENSG00000168060	Early2	0.0954863
64231_at	MS4A6A	64231	ENSG00000110077	Early3	0.135272
256435_at	ST6GALNAC3	256435	ENSG00000184005	Early2	0.0508018
2037_at	EPB41L2	2037	ENSG00000079819	Early1	0.100378
8613_at	PPAP2B	8613	ENSG00000162407	Early3	0.119189
114134_at	SLC2A13	114134	ENSG00000151229	Early2	0.115446
222223_at	KIAA1324L	222223	ENSG00000164659	Early2	0.0629037
83641_at	FAM107B	83641	ENSG00000065809	Early2	0.0900833
644246_at	KANSL1-AS1	644246	ENSG00000214401	Early2	0.0402839
80781_at	COL18A1	80781	ENSG00000182871	Late2	0.172292
8836_at	GGH	8836	ENSG00000137563	Early1	0.0720417
2697_at	GJA1	2697	ENSG00000152661	Late2	0.13644
54830_at	NUP62CL	54830	ENSG00000198088	Early1	0.109805
283375_at	SLC39A5	283375	ENSG00000139540	Early2	0.102855
51203_at	NUSAP1	51203	ENSG00000137804	Early1	0.171935
81930_at	KIF18A	81930	ENSG00000121621	Early1	0.158109
100506311_at	HOTAIRM1	100506311	ENSG00000233429	Early2	0.0593405
4888_at	NPY6R	4888	ENSG00000226306	Early2	0.0777305
8082_at	SSPN	8082	ENSG00000123096	Early2	0.0578316
1063_at	CENPF	1063	ENSG00000117724	Early1	0.184115
64943_at	NT5DC2	64943	ENSG00000168268	Early1	0.137971
285758_at	LOC285758	285758	ENSG00000227502	Early2	0.112916
10409_at	BASP1	10409	ENSG00000176788	Late3	0.0989794
55670_at	PEX26	55670	ENSG00000215193	Early2	0.163821
5333_at	PLCD1	5333	ENSG00000187091	Early2	0.165594
55450_at	CAMK2N1	55450	ENSG00000162545	Early2	0.121861
5996_at	RGS1	5996	ENSG00000090104	Late2	0.0666301
6575_at	SLC20A2	6575	ENSG00000168575	Early2	0.0904854
55355_at	HJURP	55355	ENSG00000123485	Early1	0.176244
3730_at	KAL1	3730	ENSG00000011201	Late1	0.0786691
220042_at	C11orf82	220042	ENSG00000165490	Early1	0.198547
388743_at	CAPN8	388743	ENSG00000203697	Early2	0.0431633
2295_at	FOXF2	2295	ENSG00000137273	Early3	0.0864542
6472_at	SHMT2	6472	ENSG00000182199	Early1	0.185263
25945_at	PVRL3	25945	ENSG00000177707	Early2	0.0790514
9935_at	MAFB	9935	ENSG00000204103	Late5	0.145705
130_at	ADH6	130	ENSG00000172955	Early2	0.0731318
83715_at	ESPN	83715	ENSG00000187017	Early2	0.109063
4582_at	MUC1	4582	ENSG00000185499	Early2	0.048913
6614_at	SIGLEC1	6614	ENSG00000088827	Early2	0.108402
4534_at	MTM1	4534	ENSG00000171100	Early2	0.135689
5997_at	RGS2	5997	ENSG00000116741	Late4	0.0986533
1164_at	CKS2	1164	ENSG00000123975	Early1	0.188418
6574_at	SLC20A1	6574	ENSG00000144136	Early3	0.0615658
10196_at	PRMT3	10196	ENSG00000185238	Early1	0.180785
3832_at	KIF11	3832	ENSG00000138160	Early1	0.163205
440_at	ASNS	440	ENSG00000070669	Early1	0.109908
84918_at	LRP11	84918	ENSG00000120256	Early1	0.125976
2254_at	FGF9	2254	ENSG00000102678	Early2	0.0775922
1555_at	CYP2B6	1555	ENSG00000197408	Early2	0.037647
5025_at	P2RX4	5025	ENSG00000135124	Early2	0.148817
6035_at	RNASE1	6035	ENSG00000129538	Early2	0.0611001
100505989_at	LOC100505989	100505989	ENSG00000248771	Early2	0.0718021
951_at	CD37	951	ENSG00000104894	Early3	0.102611
56937_at	PMEPA1	56937	ENSG00000124225	Early1	0.0781718
9235_at	IL32	9235	ENSG00000008517	Early3	0.042084
666_at	BOK	666	ENSG00000176720	Early1	0.0872977
2217_at	FCGRT	2217	ENSG00000104870	Early2	0.105429
5873_at	RAB27A	5873	ENSG00000069974	Early2	0.102311
1101_at	CHAD	1101	ENSG00000136457	Early2	0.122567
9188_at	DDX21	9188	ENSG00000165732	Early1	0.209779
25894_at	PLEKHG4	25894	ENSG00000196155	Early1	0.0998453
5827_at	PXMP2	5827	ENSG00000176894	Early2	0.163133
8607_at	RUVBL1	8607	ENSG00000175792	Early1	0.230595
730102_at	LOC730102	730102	ENSG00000242193	Early1	0.0575051
162394_at	SLFN5	162394	ENSG00000166750	Early1	0.071734
25903_at	OLFML2B	25903	ENSG00000162745	Late2	0.147823
65266_at	WNK4	65266	ENSG00000126562	Early2	0.0325904
134147_at	CMBL	134147	ENSG00000164237	Early2	0.107555
8910_at	SGCE	8910	ENSG00000127990	Late5	0.140686
4017_at	LOXL2	4017	ENSG00000134013	Late2	0.149966
51195_at	RAPGEFL1	51195	ENSG00000108352	Early2	0.150627
3689_at	ITGB2	3689	ENSG00000160255	Late4	0.17039
2149_at	F2R	2149	ENSG00000181104	Late1	0.0953299
91612_at	CHURC1	91612	ENSG00000258289	Early2	0.0325477
991_at	CDC20	991	ENSG00000117399	Early1	0.148366
9134_at	CCNE2	9134	ENSG00000175305	Early1	0.122828
2313_at	FLI1	2313	ENSG00000151702	Early3	0.10611
5327_at	PLAT	5327	ENSG00000104368	Early3	0.0738824
1559_at	CYP2C9	1559	ENSG00000138109	Early2	0.0631553
3122_at	HLA-DRA	3122	ENSG00000204287	Early3	0.0967123
710_at	SERPING1	710	ENSG00000149131	Late2	0.15353
53829_at	P2RY13	53829	ENSG00000181631	Late4	0.134627
9521_at	EEF1E1	9521	ENSG00000124802	Early1	0.205797
6351_at	CCL4	6351	ENSG00000129277	Late3	0.147335
84916_at	CIRH1A	84916	ENSG00000141076	Early1	0.20779
962_at	CD48	962	ENSG00000117091	Early3	0.122976
1288_at	COL4A6	1288	ENSG00000197565	Early2	0.0793476
201501_at	ZBTB7C	201501	ENSG00000184828	Early2	0.11701
94122_at	SYTL5	94122	ENSG00000147041	Early2	0.0520124
55353_at	LAPTM4B	55353	ENSG00000104341	Early1	0.0826316
162417_at	NAGS	162417	ENSG00000161653	Early2	0.0728906
116842_at	LEAP2	116842	ENSG00000164406	Early2	0.0912958
2161_at	F12	2161	ENSG00000131187	Early1	0.0887829
1019_at	CDK4	1019	ENSG00000135446	Early1	0.198334
3638_at	INSIG1	3638	ENSG00000186480	Early1	0.0691352
3783_at	KCNN4	3783	ENSG00000104783	Early1	0.0821105
2906_at	GRIN2D	2906	ENSG00000105464	Early1	0.0956426
358_at	AQP1	358	ENSG00000240583	Early3	0.0684486
4921_at	DDR2	4921	ENSG00000162733	Late2	0.179323
9636_at	ISG15	9636	ENSG00000187608	Late2	0.0756615
3433_at	IFIT2	3433	ENSG00000119922	Late4	0.0743555
9768_at	KIAA0101	9768	ENSG00000166803	Early1	0.146442
654_at	BMP6	654	ENSG00000153162	Early3	0.0674826
38_at	ACAT1	38	ENSG00000075239	Early2	0.115265
2237_at	FEN1	2237	ENSG00000168496	Early1	0.18776
8544_at	PIR	8544	ENSG00000087842	Early1	0.0969404
221395_at	GPR116	221395	ENSG00000069122	Late2	0.180647
3759_at	KCNJ2	3759	ENSG00000123700	Early2	0.0600526
650_at	BMP2	650	ENSG00000125845	Early2	0.0958777
90355_at	C5orf30	90355	ENSG00000181751	Early2	0.154126
8850_at	KAT2B	8850	ENSG00000114166	Early2	0.129095
84083_at	ZRANB3	84083	ENSG00000121988	Early1	0.118372
4094_at	MAF	4094	ENSG00000178573	Early3	0.0851426
56992_at	KIF15	56992	ENSG00000163808	Early1	0.153202
10799_at	RPP40	10799	ENSG00000124787	Early1	0.196971
4291_at	MLF1	4291	ENSG00000178053	Early1	0.0421803
288_at	ANK3	288	ENSG00000151150	Early2	0.151375
7177_at	TPSAB1	7177	ENSG00000172236	Early3	0.077195
401022_at	HOXD-AS1	401022	ENSG00000224189	Early2	0.113467
3162_at	HMOX1	3162	ENSG00000100292	Early3	0.0696542
140_at	ADORA3	140	ENSG00000121933	Early2	0.0901549
1062_at	CENPE	1062	ENSG00000138778	Early1	0.157653
4599_at	MX1	4599	ENSG00000157601	Late2	0.0465014
730101_at	LOC730101	730101	ENSG00000216775	Early1	0.0861712
216_at	ALDH1A1	216	ENSG00000165092	Early2	0.063982
5476_at	CTSA	5476	ENSG00000064601	Early2	0.0713006
10819_at	OR7E14P	10819	ENSG00000184669	Early2	0.103219
92291_at	CAPN13	92291	ENSG00000162949	Early2	0.0946747
10863_at	ADAM28	10863	ENSG00000042980	Early2	0.095082
85457_at	KIAA1737	85457	ENSG00000198894	Early2	0.156542
8406_at	SRPX	8406	ENSG00000101955	Early3	0.0593877
11074_at	TRIM31	11074	ENSG00000204616	Early2	0.0607891
6533_at	SLC6A6	6533	ENSG00000131389	Early1	0.102903
392465_at	GLOD5	392465	ENSG00000171433	Early2	0.132567
474344_at	GIMAP6	474344	ENSG00000133561	Early3	0.128516
57535_at	KIAA1324	57535	ENSG00000116299	Early2	0.029841
90141_at	EFCAB11	90141	ENSG00000140025	Early1	0.166158
2841_at	GPR18	2841	ENSG00000125245	Early3	0.101337
23314_at	SATB2	23314	ENSG00000119042	Early2	0.0955676
4234_at	METTL1	4234	ENSG00000037897	Early1	0.166984
79625_at	NDNF	79625	ENSG00000173376	Early2	0.0554813
2191_at	FAP	2191	ENSG00000078098	Late2	0.139958
284454_at	LOC284454	284454	ENSG00000267519	Early1	0.0879155
3081_at	HGD	3081	ENSG00000113924	Early2	0.0660536
8537_at	BCAS1	8537	ENSG00000064787	Early2	0.120986
8412_at	BCAR3	8412	ENSG00000137936	Early2	0.15535
120224_at	TMEM45B	120224	ENSG00000151715	Early2	0.114923
59084_at	ENPP5	59084	ENSG00000112796	Early1	0.0347585
4282_at	MIF	4282	ENSG00000240972	Early1	0.173902
55843_at	ARHGAP15	55843	ENSG00000075884	Early3	0.113028
90025_at	UBE3D	90025	ENSG00000118420	Early1	0.118381
113026_at	PLCD3	113026	ENSG00000161714	Early2	0.120989
166824_at	RASSF6	166824	ENSG00000169435	Early2	0.106096
60481_at	ELOVL5	60481	ENSG00000012660	Late1	0.0743353
11098_at	PRSS23	11098	ENSG00000150687	Early1	0.043508
25805_at	BAMBI	25805	ENSG00000095739	Early1	0.0474007
10742_at	RAI2	10742	ENSG00000131831	Early3	0.06216
23166_at	STAB1	23166	ENSG00000010327	Early2	0.0993847
5984_at	RFC4	5984	ENSG00000163918	Early1	0.215299
139886_at	SPIN4	139886	ENSG00000186767	Early1	0.138662
10800_at	CYSLTR1	10800	ENSG00000173198	Early3	0.118853
163183_at	SYNE4	163183	ENSG00000181392	Early1	0.0494576
6916_at	TBXAS1	6916	ENSG00000059377	Early1	0.0954006
10114_at	HIPK3	10114	ENSG00000110422	Late1	0.0219792
53826_at	FXYD6	53826	ENSG00000137726	Early3	0.09908
285704_at	RGMB	285704	ENSG00000174136	Early2	0.0296414
9447_at	AIM2	9447	ENSG00000163568	Late4	0.0920786
84955_at	NUDCD1	84955	ENSG00000120526	Early1	0.198744
3569_at	IL6	3569	ENSG00000136244	Late1	0.104917
85453_at	TSPYL5	85453	ENSG00000180543	Late2	0.152731
7431_at	VIM	7431	ENSG00000026025	Late2	0.164816
57715_at	SEMA4G	57715	ENSG00000095539	Early2	0.117717
6564_at	SLC15A1	6564	ENSG00000088386	Early2	0.0657158
6491_at	STIL	6491	ENSG00000123473	Early1	0.150146
23491_at	CES3	23491	ENSG00000172828	Early2	0.129145
135154_at	C6orf57	135154	ENSG00000154079	Early1	0.103342
1827_at	RCAN1	1827	ENSG00000159200	Early2	0.071064
6659_at	SOX4	6659	ENSG00000124766	Early1	0.118379
9532_at	BAG2	9532	ENSG00000112208	Late1	0.0830603
57221_at	KIAA1244	57221	ENSG00000112379	Early1	0.0559746
128346_at	C1orf162	128346	ENSG00000143110	Late5	0.119716
1131_at	CHRM3	1131	ENSG00000133019	Early1	0.0657241
3108_at	HLA-DMA	3108	ENSG00000204257	Early3	0.0910088
54843_at	SYTL2	54843	ENSG00000137501	Early2	0.0965411
29940_at	DSE	29940	ENSG00000111817	Late4	0.153913
5836_at	PYGL	5836	ENSG00000100504	Early2	0.0282281
3303_at	HSPA1A	3303	ENSG00000204389	Early2	0.0523964
28984_at	RGCC	28984	ENSG00000102760	Late1	0.0849787
100506776_at	TRG-AS1	100506776	NA	Early3	0.119713
1511_at	CTSG	1511	ENSG00000100448	Early2	0.0934676
5552_at	SRGN	5552	ENSG00000122862	Late3	0.133769
284406_at	ZFP82	284406	ENSG00000181007	Early3	0.0819031
26031_at	OSBPL3	26031	ENSG00000070882	Early1	0.137293
56704_at	JPH1	56704	ENSG00000104369	Early1	0.125964
57007_at	ACKR3	57007	ENSG00000144476	Late2	0.136681
638_at	BIK	638	ENSG00000100290	Early1	0.0883662
8743_at	TNFSF10	8743	ENSG00000121858	Early2	0.12939
1736_at	DKC1	1736	ENSG00000130826	Early1	0.22299
29785_at	CYP2S1	29785	ENSG00000167600	Early1	0.0408449
53345_at	TM6SF2	53345	ENSG00000213996	Early2	0.0959155
2791_at	GNG11	2791	ENSG00000127920	Late2	0.172244
7096_at	TLR1	7096	ENSG00000174125	Late4	0.122003
79849_at	PDZD3	79849	ENSG00000172367	Early2	0.179003
54847_at	SIDT1	54847	ENSG00000072858	Early2	0.0689722
1513_at	CTSK	1513	ENSG00000143387	Late2	0.170507
326624_at	RAB37	326624	ENSG00000172794	Early2	0.0925576
5329_at	PLAUR	5329	ENSG00000011422	Late3	0.114552
136_at	ADORA2B	136	ENSG00000170425	Early1	0.0288071
1191_at	CLU	1191	ENSG00000120885	Early3	0.057408
94240_at	EPSTI1	94240	ENSG00000133106	Late1	0.0487793
169792_at	GLIS3	169792	ENSG00000107249	Early1	0.0311536
64407_at	RGS18	64407	ENSG00000150681	Late4	0.135614
30817_at	EMR2	30817	ENSG00000127507	Late3	0.139529
50853_at	VILL	50853	ENSG00000136059	Early2	0.138327
1012_at	CDH13	1012	ENSG00000140945	Late1	0.100564
9547_at	CXCL14	9547	ENSG00000145824	Early2	0.0555016
2146_at	EZH2	2146	ENSG00000106462	Early1	0.180915
79365_at	BHLHE41	79365	ENSG00000123095	Early2	0.0595314
87_at	ACTN1	87	ENSG00000072110	Early1	0.13518
55722_at	CEP72	55722	ENSG00000112877	Early1	0.137562
79710_at	MORC4	79710	ENSG00000133131	Early1	0.142328
5357_at	PLS1	5357	ENSG00000120756	Early2	0.166953
51645_at	PPIL1	51645	ENSG00000137168	Early1	0.205649
11221_at	DUSP10	11221	ENSG00000143507	Early1	0.115681
11260_at	XPOT	11260	ENSG00000184575	Early1	0.189365
5698_at	PSMB9	5698	ENSG00000240065	Late1	0.0610504
10459_at	MAD2L2	10459	ENSG00000116670	Early1	0.158081
51166_at	AADAT	51166	ENSG00000109576	Early1	0.0864742
3575_at	IL7R	3575	ENSG00000168685	Late2	0.103417
84958_at	SYTL1	84958	ENSG00000142765	Early1	0.0492964
8645_at	KCNK5	8645	ENSG00000164626	Early2	0.110028
2982_at	GUCY1A3	2982	ENSG00000164116	Late2	0.20252
23171_at	GPD1L	23171	ENSG00000152642	Early2	0.152441
1003_at	CDH5	1003	ENSG00000179776	Late2	0.164683
79899_at	PRR5L	79899	ENSG00000135362	Early2	0.142867
79730_at	NSUN7	79730	ENSG00000179299	Early1	0.0481595
9540_at	TP53I3	9540	ENSG00000115129	Early2	0.130461
9465_at	AKAP7	9465	ENSG00000118507	Early2	0.0708515
312_at	ANXA13	312	ENSG00000104537	Early2	0.0421178
5209_at	PFKFB3	5209	ENSG00000170525	Late3	0.142912
25927_at	CNRIP1	25927	ENSG00000119865	Late5	0.168969
84842_at	HPDL	84842	ENSG00000186603	Early1	0.105944
2258_at	FGF13	2258	ENSG00000129682	Late1	0.0200041
11339_at	OIP5	11339	ENSG00000104147	Early1	0.144612
55024_at	BANK1	55024	ENSG00000153064	Early3	0.0680199
6566_at	SLC16A1	6566	ENSG00000155380	Early2	0.0661037
1281_at	COL3A1	1281	ENSG00000168542	Late2	0.157874
5471_at	PPAT	5471	ENSG00000128059	Early1	0.17423
59352_at	LGR6	59352	ENSG00000133067	Early1	0.0541356
4502_at	MT2A	4502	ENSG00000125148	Early3	0.0595
23015_at	GOLGA8A	23015	ENSG00000175265	Early2	0.0242725
55616_at	ASAP3	55616	ENSG00000088280	Early2	0.127455
51659_at	GINS2	51659	ENSG00000131153	Early1	0.141172
3838_at	KPNA2	3838	ENSG00000182481	Early1	0.20092
1410_at	CRYAB	1410	ENSG00000109846	Late5	0.135265
10813_at	UTP14A	10813	ENSG00000156697	Early1	0.176738
23397_at	NCAPH	23397	ENSG00000121152	Early1	0.176228
3437_at	IFIT3	3437	ENSG00000119917	Late3	0.0733795
26227_at	PHGDH	26227	ENSG00000092621	Early1	0.085225
11314_at	CD300A	11314	ENSG00000167851	Late4	0.161545
9411_at	ARHGAP29	9411	ENSG00000137962	Late1	0.0919598
9639_at	ARHGEF10	9639	ENSG00000104728	Early1	0.121178
353322_at	ANKRD37	353322	ENSG00000186352	Late3	0.0407823
55299_at	BRIX1	55299	ENSG00000113460	Early1	0.20182
81706_at	PPP1R14C	81706	ENSG00000198729	Early2	0.0631236
56902_at	PNO1	56902	ENSG00000115946	Early1	0.20362
8089_at	YEATS4	8089	ENSG00000127337	Early1	0.136816
644844_at	PHGR1	644844	ENSG00000233041	Early2	0.150248
908_at	CCT6A	908	ENSG00000146731	Early1	0.219735
389332_at	LOC389332	389332	ENSG00000271824	Early2	0.132801
5793_at	PTPRG	5793	ENSG00000144724	Early1	0.0954781
1436_at	CSF1R	1436	ENSG00000182578	Early3	0.134103
79817_at	MOB3B	79817	ENSG00000120162	Early2	0.159964
3234_at	HOXD8	3234	ENSG00000175879	Early3	0.0493985
10451_at	VAV3	10451	ENSG00000134215	Early2	0.0832272
2114_at	ETS2	2114	ENSG00000157557	Early1	0.10314
5937_at	RBMS1	5937	ENSG00000153250	Late2	0.175595
201283_at	AMZ2P1	201283	ENSG00000214174	Early1	0.0722477
26471_at	NUPR1	26471	ENSG00000176046	Early2	0.0399588
5125_at	PCSK5	5125	ENSG00000099139	Early3	0.0674054
284422_at	C19orf77	284422	ENSG00000095932	Early2	0.0462607
84141_at	EVA1A	84141	ENSG00000115363	Late1	0.0864814
3174_at	HNF4G	3174	ENSG00000164749	Early2	0.097749
5002_at	SLC22A18	5002	ENSG00000110628	Early2	0.0923626
6330_at	SCN4B	6330	ENSG00000177098	Early2	0.0861888
56892_at	C8orf4	56892	ENSG00000176907	Early1	0.0604789
79682_at	MLF1IP	79682	ENSG00000151725	Early1	0.132911
4835_at	NQO2	4835	ENSG00000124588	Early1	0.0777497
83461_at	CDCA3	83461	ENSG00000111665	Early1	0.146335
3612_at	IMPA1	3612	ENSG00000133731	Early2	0.134997
5820_at	PVT1	5820	ENSG00000249859	Early1	0.0928601
55502_at	HES6	55502	ENSG00000144485	Early1	0.104435
8395_at	PIP5K1B	8395	ENSG00000107242	Early2	0.138686
150244_at	ZDHHC8P1	150244	ENSG00000133519	Early1	0.0457883
79711_at	IPO4	79711	ENSG00000196497	Early1	0.122549
10446_at	LRRN2	10446	ENSG00000170382	Early2	0.123751
27077_at	B9D1	27077	ENSG00000108641	Early1	0.132694
6578_at	SLCO2A1	6578	ENSG00000174640	Early2	0.0961449
338773_at	TMEM119	338773	ENSG00000183160	Late5	0.108763
10926_at	DBF4	10926	ENSG00000006634	Early1	0.21021
9232_at	PTTG1	9232	ENSG00000164611	Early1	0.161653
1951_at	CELSR3	1951	ENSG00000008300	Early1	0.100749
7325_at	UBE2E2	7325	ENSG00000182247	Late2	0.150989
203522_at	DDX26B	203522	ENSG00000165359	Early2	0.085588
11167_at	FSTL1	11167	ENSG00000163430	Late2	0.183944
113802_at	HENMT1	113802	ENSG00000162639	Early1	0.0665865
192134_at	B3GNT6	192134	ENSG00000198488	Early2	0.0535977
1847_at	DUSP5	1847	ENSG00000138166	Early3	0.042975
114044_at	MCM3AP-AS1	114044	ENSG00000215424	Early1	0.0943101
57820_at	CCNB1IP1	57820	ENSG00000100814	Early1	0.116502
85007_at	PHYKPL	85007	ENSG00000175309	Early2	0.175608
56648_at	EIF5A2	56648	ENSG00000163577	Early1	0.136438
10549_at	PRDX4	10549	ENSG00000123131	Early1	0.124166
3087_at	HHEX	3087	ENSG00000152804	Late4	0.121017
11030_at	RBPMS	11030	ENSG00000157110	Early1	0.0738689
283120_at	H19	283120	ENSG00000130600	Early1	0.0730889
1289_at	COL5A1	1289	ENSG00000130635	Late2	0.173318
1978_at	EIF4EBP1	1978	ENSG00000187840	Early1	0.141152
53630_at	BCMO1	53630	ENSG00000135697	Early2	0.0597198
2882_at	GPX7	2882	ENSG00000116157	Late1	0.0761853
10_at	NAT2	10	ENSG00000156006	Early2	0.107286
169611_at	OLFML2A	169611	ENSG00000185585	Late2	0.139783
10019_at	SH2B3	10019	ENSG00000111252	Late5	0.0933651
2335_at	FN1	2335	ENSG00000115414	Late2	0.133045
9353_at	SLIT2	9353	ENSG00000145147	Early3	0.0673258
54801_at	HAUS6	54801	ENSG00000147874	Early1	0.171159
64946_at	CENPH	64946	ENSG00000153044	Early1	0.184352
1475_at	CSTA	1475	ENSG00000121552	Late3	0.092473
64092_at	SAMSN1	64092	ENSG00000155307	Late3	0.124101
63875_at	MRPL17	63875	ENSG00000158042	Early1	0.215715
222171_at	PRR15	222171	ENSG00000176532	Early2	0.103352
145788_at	C15orf65	145788	ENSG00000261652	Early2	0.0494552
5255_at	PHKA1	5255	ENSG00000067177	Early1	0.104605
92840_at	REEP6	92840	ENSG00000115255	Early1	0.057439
4600_at	MX2	4600	ENSG00000183486	Late3	0.0927996
51705_at	EMCN	51705	ENSG00000164035	Late2	0.133143
7077_at	TIMP2	7077	ENSG00000035862	Late2	0.147276
56901_at	NDUFA4L2	56901	ENSG00000185633	Late1	0.0931564
7430_at	EZR	7430	ENSG00000092820	Early2	0.0643247
3236_at	HOXD10	3236	ENSG00000128710	Early2	0.0388262
27253_at	PCDH17	27253	ENSG00000118946	Late2	0.171051
3587_at	IL10RA	3587	ENSG00000110324	Early3	0.130871
10403_at	NDC80	10403	ENSG00000080986	Early1	0.147068
84617_at	TUBB6	84617	ENSG00000176014	Late2	0.187392
7305_at	TYROBP	7305	ENSG00000011600	Late4	0.165481
80352_at	RNF39	80352	ENSG00000204618	Early1	0.0642023
196996_at	GRAMD2	196996	ENSG00000175318	Early1	0.077784
7263_at	TST	7263	ENSG00000128311	Early2	0.151175
10606_at	PAICS	10606	ENSG00000128050	Early1	0.202851
57156_at	TMEM63C	57156	ENSG00000165548	Early2	0.0755123
57520_at	HECW2	57520	ENSG00000138411	Late1	0.109735
972_at	CD74	972	ENSG00000019582	Early3	0.104498
29842_at	TFCP2L1	29842	ENSG00000115112	Early2	0.0967491
22849_at	CPEB3	22849	ENSG00000107864	Early2	0.157572
58191_at	CXCL16	58191	ENSG00000161921	Early1	0.0754322
51228_at	GLTP	51228	ENSG00000139433	Early2	0.176489
2669_at	GEM	2669	ENSG00000164949	Late1	0.0945732
196383_at	RILPL2	196383	ENSG00000150977	Late3	0.109591
5593_at	PRKG2	5593	ENSG00000138669	Early2	0.101266
57708_at	MIER1	57708	ENSG00000198160	Early2	0.142055
27035_at	NOX1	27035	ENSG00000007952	Early1	0.0306955
54866_at	PPP1R14D	54866	ENSG00000166143	Early2	0.102039
4753_at	NELL2	4753	ENSG00000184613	Early2	0.063804
2766_at	GMPR	2766	ENSG00000137198	Early1	0.0754587
3557_at	IL1RN	3557	ENSG00000136689	Late3	0.115128
1901_at	S1PR1	1901	ENSG00000170989	Late2	0.175294
4935_at	GPR143	4935	ENSG00000101850	Early1	0.0648683
26354_at	GNL3	26354	ENSG00000163938	Early1	0.226601
1326_at	MAP3K8	1326	ENSG00000107968	Late3	0.115861
23169_at	SLC35D1	23169	ENSG00000116704	Early2	0.151086
9_at	NAT1	9	ENSG00000171428	Early2	0.104851
65986_at	ZBTB10	65986	ENSG00000205189	Early2	0.054726
27147_at	DENND2A	27147	ENSG00000146966	Early2	0.0876526
9050_at	PSTPIP2	9050	ENSG00000152229	Early1	0.0555778
8187_at	ZNF239	8187	ENSG00000196793	Early1	0.124134
11009_at	IL24	11009	ENSG00000162892	Late1	0.101566
55257_at	MRGBP	55257	ENSG00000101189	Early1	0.135272
54704_at	PDP1	54704	ENSG00000164951	Early1	0.0645827
64332_at	NFKBIZ	64332	ENSG00000144802	Late3	0.0881222
5420_at	PODXL	5420	ENSG00000128567	Early1	0.0858956
4061_at	LY6E	4061	ENSG00000160932	Late1	0.0942719
100820829_at	MYZAP	100820829	ENSG00000137878	Early2	0.122199
113452_at	TMEM54	113452	ENSG00000121900	Early2	0.148456
79101_at	TAF1D	79101	ENSG00000166012	Early1	0.130279
399948_at	COLCA1	399948	ENSG00000196167	Early2	0.0290854
64123_at	ELTD1	64123	ENSG00000162618	Late2	0.183835
2207_at	FCER1G	2207	ENSG00000158869	Late4	0.16824
10576_at	CCT2	10576	ENSG00000166226	Early1	0.191822
5176_at	SERPINF1	5176	ENSG00000132386	Late5	0.143562
5376_at	PMP22	5376	ENSG00000109099	Late5	0.109587
1499_at	CTNNB1	1499	ENSG00000168036	Early1	0.0509552
51042_at	ZNF593	51042	ENSG00000142684	Early1	0.145412
54933_at	RHBDL2	54933	ENSG00000158315	Early2	0.0680191
29902_at	FAM216A	29902	ENSG00000204856	Early1	0.104073
3055_at	HCK	3055	ENSG00000101336	Late4	0.161326
3109_at	HLA-DMB	3109	ENSG00000242574	Early3	0.125065
1396_at	CRIP1	1396	ENSG00000213145	Early2	0.0269787
2618_at	GART	2618	ENSG00000159131	Early1	0.197311
9750_at	FAM65B	9750	ENSG00000111913	Late3	0.132328
25878_at	MXRA5	25878	ENSG00000101825	Late2	0.174634
1805_at	DPT	1805	ENSG00000143196	Late5	0.0861181
3655_at	ITGA6	3655	ENSG00000091409	Early1	0.0919552
672_at	BRCA1	672	ENSG00000012048	Early1	0.177971
54_at	ACP5	54	ENSG00000102575	Early3	0.0972433
5362_at	PLXNA2	5362	ENSG00000076356	Early2	0.164189
79023_at	NUP37	79023	ENSG00000075188	Early1	0.201548
6493_at	SIM2	6493	ENSG00000159263	Early1	0.0738378
11004_at	KIF2C	11004	ENSG00000142945	Early1	0.174092
28989_at	NTMT1	28989	ENSG00000148335	Early1	0.171159
122786_at	FRMD6	122786	ENSG00000139926	Late2	0.153328
5325_at	PLAGL1	5325	ENSG00000118495	Early2	0.0426736
22836_at	RHOBTB3	22836	ENSG00000164292	Early1	0.0525899
55911_at	APOBR	55911	ENSG00000184730	Early2	0.120724
51062_at	ATL1	51062	ENSG00000198513	Early2	0.0894477
219348_at	PLAC9	219348	ENSG00000189129	Early3	0.0867586
114907_at	FBXO32	114907	ENSG00000156804	Early2	0.0760495
6502_at	SKP2	6502	ENSG00000145604	Early1	0.128448
6039_at	RNASE6	6039	ENSG00000169413	Early3	0.0991494
114804_at	RNF157	114804	ENSG00000141576	Early2	0.0431215
359845_at	FAM101B	359845	ENSG00000183688	Late2	0.164828
3115_at	HLA-DPB1	3115	ENSG00000215048	Early3	0.0940402
7050_at	TGIF1	7050	ENSG00000177426	Early1	0.124072
3397_at	ID1	3397	ENSG00000125968	Early1	0.0484392
6678_at	SPARC	6678	ENSG00000113140	Late2	0.178115
9510_at	ADAMTS1	9510	ENSG00000154734	Late2	0.124878
221150_at	SKA3	221150	ENSG00000165480	Early1	0.156752
84674_at	CARD6	84674	ENSG00000132357	Early1	0.0624975
4082_at	MARCKS	4082	ENSG00000155130	Early2	0.098091
55726_at	ASUN	55726	ENSG00000064102	Early1	0.191521
23560_at	GTPBP4	23560	ENSG00000107937	Early1	0.228053
80055_at	PGAP1	80055	ENSG00000197121	Early1	0.053349
3290_at	HSD11B1	3290	ENSG00000117594	Late2	0.150975
5151_at	PDE8A	5151	ENSG00000073417	Early2	0.140145
4162_at	MCAM	4162	ENSG00000076706	Late2	0.154964
8639_at	AOC3	8639	ENSG00000131471	Early3	0.100835
28987_at	NOB1	28987	ENSG00000141101	Early1	0.131667
4277_at	MICB	4277	ENSG00000204516	Early1	0.0732959
10396_at	ATP8A1	10396	ENSG00000124406	Early2	0.0986743
55646_at	LYAR	55646	ENSG00000145220	Early1	0.208486
56654_at	NPDC1	56654	ENSG00000107281	Early1	0.0503946
196410_at	METTL7B	196410	ENSG00000170439	Early2	0.0798193
23642_at	SNHG1	23642	ENSG00000255717	Early1	0.154377
10420_at	TESK2	10420	ENSG00000070759	Early2	0.113769
952_at	CD38	952	ENSG00000004468	Early3	0.0775292
56944_at	OLFML3	56944	ENSG00000116774	Early3	0.0873145
266812_at	NAP1L5	266812	ENSG00000177432	Early1	0.0704444
4629_at	MYH11	4629	ENSG00000133392	Early3	0.0848846
54857_at	GDPD2	54857	ENSG00000130055	Early2	0.14149
1794_at	DOCK2	1794	ENSG00000134516	Early3	0.132314
3059_at	HCLS1	3059	ENSG00000180353	Late4	0.1694
682_at	BSG	682	ENSG00000172270	Early2	0.0642879
81034_at	SLC25A32	81034	ENSG00000164933	Early1	0.170733
11335_at	CBX3	11335	ENSG00000122565	Early1	0.21424
729238_at	SFTPA2	729238	ENSG00000185303	Early2	0.0573855
282997_at	PDCD4-AS1	282997	NA	Early2	0.120091
26278_at	SACS	26278	ENSG00000151835	Late1	0.0989646
9056_at	SLC7A7	9056	ENSG00000155465	Late2	0.0821434
10397_at	NDRG1	10397	ENSG00000104419	Early2	0.0730118
55016_at	2014-03-01	55016	ENSG00000145416	Early3	0.12047
154141_at	MBOAT1	154141	ENSG00000172197	Early2	0.0990188
8624_at	PSMG1	8624	ENSG00000183527	Early1	0.148537
6307_at	MSMO1	6307	ENSG00000052802	Early1	0.059745
26270_at	FBXO6	26270	ENSG00000116663	Early1	0.053789
6383_at	SDC2	6383	ENSG00000169439	Late2	0.193076
57655_at	GRAMD1A	57655	ENSG00000089351	Early1	0.106644
3198_at	HOXA1	3198	ENSG00000105991	Early2	0.0634752
8801_at	SUCLG2	8801	ENSG00000172340	Early2	0.111757
914_at	CD2	914	ENSG00000116824	Early3	0.0983315
51280_at	GOLM1	51280	ENSG00000135052	Early2	0.0927887
54900_at	LAX1	54900	ENSG00000122188	Early3	0.0743282
27074_at	LAMP3	27074	ENSG00000078081	Late1	0.0674831
5190_at	PEX6	5190	ENSG00000124587	Early2	0.0232639
9767_at	PHF16	9767	ENSG00000102221	Early1	0.156033
5236_at	PGM1	5236	ENSG00000079739	Early2	0.111413
701_at	BUB1B	701	ENSG00000156970	Early1	0.173202
26147_at	PHF19	26147	ENSG00000119403	Early1	0.179086
10398_at	MYL9	10398	ENSG00000101335	Late2	0.158814
4093_at	SMAD9	4093	ENSG00000120693	Early1	0.0331437
54534_at	MRPL50	54534	ENSG00000136897	Early1	0.162324
838_at	CASP5	838	ENSG00000137757	Early2	0.0719009
5789_at	PTPRD	5789	ENSG00000153707	Early2	0.0472046
633_at	BGN	633	ENSG00000182492	Late2	0.144878
3488_at	IGFBP5	3488	ENSG00000115461	Late2	0.133177
200879_at	LIPH	200879	ENSG00000163898	Early2	0.113776
28966_at	SNX24	28966	ENSG00000064652	Early2	0.14166
6723_at	SRM	6723	ENSG00000116649	Early1	0.134701
57085_at	AGTRAP	57085	ENSG00000177674	Early1	0.131012
5468_at	PPARG	5468	ENSG00000132170	Early2	0.0731466
8660_at	IRS2	8660	ENSG00000185950	Early1	0.0601115
100093630_at	SNHG8	100093630	ENSG00000269893	Early1	0.0954203
10628_at	TXNIP	10628	ENSG00000117289	Early2	0.0895382
23643_at	LY96	23643	ENSG00000154589	Late4	0.144674
1643_at	DDB2	1643	ENSG00000134574	Early1	0.0847228
214_at	ALCAM	214	ENSG00000170017	Early1	0.0779421
716_at	C1S	716	ENSG00000182326	Late2	0.150735
25823_at	TPSG1	25823	ENSG00000116176	Early2	0.0787053
23327_at	NEDD4L	23327	ENSG00000049759	Early2	0.113514
79901_at	CYBRD1	79901	ENSG00000071967	Early3	0.0706406
813_at	CALU	813	ENSG00000128595	Late1	0.158235
23160_at	WDR43	23160	ENSG00000163811	Early1	0.154543
10516_at	FBLN5	10516	ENSG00000140092	Late5	0.107956
5865_at	RAB3B	5865	ENSG00000169213	Early2	0.0434827
27303_at	RBMS3	27303	ENSG00000144642	Early3	0.111641
55179_at	FAIM	55179	ENSG00000158234	Early1	0.115022
54206_at	ERRFI1	54206	ENSG00000116285	Late1	0.0705487
254428_at	SLC41A1	254428	ENSG00000133065	Late1	0.104484
283267_at	LINC00294	283267	NA	Early2	0.14594
2014_at	EMP3	2014	ENSG00000142227	Late2	0.166089
5654_at	HTRA1	5654	ENSG00000166033	Late2	0.160758
1412_at	CRYBA2	1412	ENSG00000163499	Early2	0.0735935
2294_at	FOXF1	2294	ENSG00000103241	Late5	0.136361
1820_at	ARID3A	1820	ENSG00000116017	Early1	0.0828954
55839_at	CENPN	55839	ENSG00000166451	Early1	0.208111
256764_at	WDR72	256764	ENSG00000166415	Early1	0.0668032
3949_at	LDLR	3949	ENSG00000130164	Early1	0.0781571
7083_at	TK1	7083	ENSG00000167900	Early1	0.13765
148418_at	SAMD13	148418	ENSG00000203943	Early2	0.0927047
4673_at	NAP1L1	4673	ENSG00000187109	Early1	0.168611
10020_at	GNE	10020	ENSG00000159921	Early2	0.0325643
2762_at	GMDS	2762	ENSG00000112699	Early1	0.0770959
10810_at	WASF3	10810	ENSG00000132970	Late5	0.0766173
83862_at	TMEM120A	83862	ENSG00000189077	Early2	0.105049
8842_at	PROM1	8842	ENSG00000007062	Early2	0.0380661
140838_at	NANP	140838	ENSG00000170191	Early1	0.152795
3937_at	LCP2	3937	ENSG00000043462	Late3	0.137556
9770_at	RASSF2	9770	ENSG00000101265	Late4	0.173226
266655_at	LINC00094	266655	ENSG00000235106	Early1	0.117185
72_at	ACTG2	72	ENSG00000163017	Late2	0.112218
56849_at	TCEAL7	56849	ENSG00000182916	Late2	0.163447
401466_at	C8orf59	401466	ENSG00000176731	Early1	0.100242
10788_at	IQGAP2	10788	ENSG00000145703	Early2	0.11053
56521_at	DNAJC12	56521	ENSG00000108176	Early2	0.0159156
1843_at	DUSP1	1843	ENSG00000120129	Late4	0.0748839
89866_at	SEC16B	89866	ENSG00000120341	Early1	0.0545451
27010_at	TPK1	27010	ENSG00000196511	Early2	0.0567278
222236_at	NAPEPLD	222236	ENSG00000161048	Early2	0.124964
1043_at	CD52	1043	ENSG00000169442	Early3	0.108112
2043_at	EPHA4	2043	ENSG00000116106	Early2	0.0348461
2274_at	FHL2	2274	ENSG00000115641	Early1	0.0750308
116159_at	CYYR1	116159	ENSG00000166265	Late2	0.14509
3755_at	KCNG1	3755	ENSG00000026559	Early2	0.069744
200728_at	TMEM17	200728	ENSG00000186889	Early1	0.0749725
10615_at	SPAG5	10615	ENSG00000076382	Early1	0.138711
8644_at	AKR1C3	8644	ENSG00000196139	Early2	0.0745027
83935_at	TMEM133	83935	ENSG00000170647	Early2	0.0959318
114112_at	TXNRD3	114112	ENSG00000197763	Early1	0.134772
5557_at	PRIM1	5557	ENSG00000198056	Early1	0.186685
7280_at	TUBB2A	7280	ENSG00000137267	Late1	0.019209
7298_at	TYMS	7298	ENSG00000176890	Early1	0.12917
5948_at	RBP2	5948	ENSG00000114113	Late1	0.0175089
8829_at	NRP1	8829	ENSG00000099250	Late2	0.170046
8535_at	CBX4	8535	ENSG00000141582	Early1	0.104235
4839_at	NOP2	4839	ENSG00000111641	Early1	0.182187
930_at	CD19	930	ENSG00000177455	Early3	0.0795283
8754_at	ADAM9	8754	ENSG00000168615	Early1	0.0735626
57447_at	NDRG2	57447	ENSG00000165795	Early2	0.113294
131177_at	FAM3D	131177	ENSG00000198643	Early2	0.0667617
2948_at	GSTM4	2948	ENSG00000168765	Early2	0.0884765
2201_at	FBN2	2201	ENSG00000138829	Late5	0.0844483
23359_at	FAM189A1	23359	ENSG00000104059	Early2	0.0719892
23140_at	ZZEF1	23140	ENSG00000074755	Early2	0.176372
29980_at	DONSON	29980	ENSG00000159147	Early1	0.178853
64097_at	EPB41L4A	64097	ENSG00000129595	Early2	0.0842235
65062_at	TMEM237	65062	ENSG00000155755	Early1	0.1681
55038_at	CDCA4	55038	ENSG00000170779	Early1	0.205634
445_at	ASS1	445	ENSG00000130707	Early1	0.0656911
51334_at	PRR16	51334	ENSG00000184838	Late2	0.183717
1515_at	CTSV	1515	ENSG00000136943	Early1	0.0702715
6636_at	SNRPF	6636	ENSG00000139343	Early1	0.190986
1906_at	EDN1	1906	ENSG00000078401	Early2	0.0578346
1292_at	COL6A2	1292	ENSG00000142173	Late2	0.167278
91419_at	XRCC6BP1	91419	ENSG00000166896	Early2	0.101393
25879_at	DCAF13	25879	ENSG00000164934	Early1	0.175985
5156_at	PDGFRA	5156	ENSG00000134853	Late5	0.11426
64785_at	GINS3	64785	ENSG00000181938	Early1	0.175148
11015_at	KDELR3	11015	ENSG00000100196	Early1	0.0763038
54941_at	RNF125	54941	ENSG00000101695	Early2	0.0857177
123_at	PLIN2	123	ENSG00000147872	Early1	0.0616624
963_at	CD53	963	ENSG00000143119	Late4	0.169499
5627_at	PROS1	5627	ENSG00000184500	Early3	0.0523842
4891_at	SLC11A2	4891	ENSG00000110911	Early1	0.0779972
55521_at	TRIM36	55521	ENSG00000152503	Early2	0.136673
91624_at	NEXN	91624	ENSG00000162614	Late2	0.164268
7264_at	TSTA3	7264	ENSG00000104522	Early1	0.110676
441168_at	FAM26F	441168	ENSG00000188820	Early3	0.0764274
259266_at	ASPM	259266	ENSG00000066279	Early1	0.14126
157574_at	FBXO16	157574	ENSG00000214050	Early1	0.0751486
231_at	AKR1B1	231	ENSG00000085662	Late2	0.143803
10677_at	AVIL	10677	ENSG00000135407	Early2	0.0751138
6925_at	TCF4	6925	ENSG00000196628	Late2	0.174857
9732_at	DOCK4	9732	ENSG00000128512	Late4	0.125443
866_at	SERPINA6	866	ENSG00000170099	Early2	0.0629044
58985_at	IL22RA1	58985	ENSG00000142677	Early2	0.071702
79657_at	RPAP3	79657	ENSG00000005175	Early1	0.156157
283298_at	OLFML1	283298	ENSG00000183801	Late5	0.134159
26271_at	FBXO5	26271	ENSG00000112029	Early1	0.16816
834_at	CASP1	834	ENSG00000137752	Early1	0.0245723
5631_at	PRPS1	5631	ENSG00000147224	Early1	0.155964
6548_at	SLC9A1	6548	ENSG00000090020	Early2	0.150302
2983_at	GUCY1B3	2983	ENSG00000061918	Late2	0.192312
51649_at	MRPS23	51649	ENSG00000181610	Early1	0.176134
4176_at	MCM7	4176	ENSG00000166508	Early1	0.172287
55131_at	RBM28	55131	ENSG00000106344	Early1	0.202985
1879_at	EBF1	1879	ENSG00000164330	Late2	0.166792
25780_at	RASGRP3	25780	ENSG00000152689	Early3	0.117066
440434_at	LOC440434	440434	ENSG00000174093	Early1	0.0578642
5425_at	POLD2	5425	ENSG00000106628	Early1	0.20374
93081_at	TEX30	93081	ENSG00000151287	Early1	0.115885
83596_at	BCL2L12	83596	ENSG00000126453	Early1	0.189709
27071_at	DAPP1	27071	ENSG00000070190	Early1	0.0508282
7086_at	TKT	7086	ENSG00000163931	Early1	0.181015
4689_at	NCF4	4689	ENSG00000100365	Late4	0.105725
80129_at	CCDC170	80129	ENSG00000120262	Late1	0.0269705
1429_at	CRYZ	1429	ENSG00000116791	Early1	0.0613694
51466_at	EVL	51466	ENSG00000196405	Early3	0.123077
6876_at	TAGLN	6876	ENSG00000149591	Late2	0.153596
94121_at	SYTL4	94121	ENSG00000102362	Early2	0.0921769
1942_at	EFNA1	1942	ENSG00000169242	Early2	0.0593132
474_at	ATOH1	474	ENSG00000172238	Early2	0.0581502
79070_at	KDELC1	79070	ENSG00000134901	Late2	0.114254
7464_at	CORO2A	7464	ENSG00000106789	Early2	0.10091
9214_at	FAIM3	9214	ENSG00000162894	Early3	0.0970534
3816_at	KLK1	3816	ENSG00000167748	Early2	0.0688638
490_at	ATP2B1	490	ENSG00000070961	Early2	0.0917148
51491_at	NOP16	51491	ENSG00000048162	Early1	0.167189
54431_at	DNAJC10	54431	ENSG00000077232	Early1	0.120328
256236_at	NAPSB	256236	ENSG00000131401	Early3	0.101799
9781_at	RNF144A	9781	ENSG00000151692	Early2	0.0680883
1307_at	COL16A1	1307	ENSG00000084636	Early1	0.0716294
63979_at	FIGNL1	63979	ENSG00000132436	Early1	0.182871
23090_at	ZNF423	23090	ENSG00000102935	Early3	0.0501783
6536_at	SLC6A9	6536	ENSG00000196517	Early2	0.0800273
7472_at	WNT2	7472	ENSG00000105989	Late1	0.103123
83716_at	CRISPLD2	83716	ENSG00000103196	Late5	0.106189
4644_at	MYO5A	4644	ENSG00000197535	Late5	0.147954
9023_at	CH25H	9023	ENSG00000138135	Late2	0.0761881
10439_at	OLFM1	10439	ENSG00000130558	Late5	0.0719435
54360_at	CYTL1	54360	ENSG00000170891	Late2	0.0930465
7754_at	ZNF204P	7754	ENSG00000204789	Early2	0.0346765
925_at	CD8A	925	ENSG00000153563	Early3	0.0748236
1230_at	CCR1	1230	ENSG00000163823	Late4	0.155085
55107_at	ANO1	55107	ENSG00000131620	Early1	0.066109
84154_at	RPF2	84154	ENSG00000197498	Early1	0.180739
483_at	ATP1B3	483	ENSG00000069849	Early2	0.0935261
1910_at	EDNRB	1910	ENSG00000136160	Early3	0.0769304
4241_at	MFI2	4241	ENSG00000163975	Early1	0.0698438
643224_at	TUBBP5	643224	ENSG00000261456	Early1	0.0270865
23370_at	ARHGEF18	23370	ENSG00000104880	Early2	0.120837
84954_at	MPND	84954	ENSG00000008382	Early2	0.175878
4172_at	MCM3	4172	ENSG00000112118	Early1	0.193952
54205_at	CYCS	54205	ENSG00000172115	Early2	0.0917748
100131564_at	LOC100131564	100131564	ENSG00000223745	Early2	0.0357929
2934_at	GSN	2934	ENSG00000148180	Early2	0.076651
10135_at	NAMPT	10135	ENSG00000105835	Late1	0.0912728
55329_at	MNS1	55329	ENSG00000138587	Early1	0.104438
3669_at	ISG20	3669	ENSG00000172183	Early3	0.0390059
29091_at	STXBP6	29091	ENSG00000168952	Early1	0.0620165
55720_at	TSR1	55720	ENSG00000167721	Early1	0.196113
91862_at	MARVELD3	91862	ENSG00000140832	Early2	0.167559
57118_at	CAMK1D	57118	ENSG00000183049	Early2	0.0777251
10673_at	TNFSF13B	10673	ENSG00000102524	Late4	0.159267
7171_at	TPM4	7171	ENSG00000167460	Early1	0.087919
23677_at	SH3BP4	23677	ENSG00000130147	Early1	0.107348
51309_at	ARMCX1	51309	ENSG00000126947	Late5	0.126799
56999_at	ADAMTS9	56999	ENSG00000163638	Early1	0.0800418
94274_at	PPP1R14A	94274	ENSG00000167641	Late5	0.0964326
57491_at	AHRR	57491	ENSG00000063438	Early2	0.0703519
6932_at	TCF7	6932	ENSG00000081059	Early1	0.0835787
23635_at	SSBP2	23635	ENSG00000145687	Early3	0.0691722
197358_at	NLRC3	197358	ENSG00000167984	Early3	0.0970334
4907_at	NT5E	4907	ENSG00000135318	Early2	0.0209166
148213_at	ZNF681	148213	ENSG00000196172	Early2	0.0600261
221883_at	HOXA11-AS	221883	ENSG00000240990	Early2	0.045526
171024_at	SYNPO2	171024	ENSG00000172403	Early3	0.0810433
1069_at	CETN2	1069	ENSG00000147400	Early1	0.189878
7097_at	TLR2	7097	ENSG00000137462	Late3	0.160459
140462_at	ASB9	140462	ENSG00000102048	Early1	0.106887
11099_at	PTPN21	11099	ENSG00000070778	Early2	0.153414
118472_at	ZNF511	118472	ENSG00000198546	Early1	0.151457
79668_at	PARP8	79668	ENSG00000151883	Late1	0.0271089
55857_at	PLK1S1	55857	NA	Early1	0.0615052
4680_at	CEACAM6	4680	ENSG00000086548	Early1	0.0655753
5782_at	PTPN12	5782	ENSG00000127947	Early1	0.104652
5464_at	PPA1	5464	ENSG00000180817	Early1	0.158444
3164_at	NR4A1	3164	ENSG00000123358	Early1	0.0695926
7805_at	LAPTM5	7805	ENSG00000162511	Late4	0.169899
1615_at	DARS	1615	ENSG00000115866	Early1	0.163548
284948_at	SH2D6	284948	ENSG00000152292	Early2	0.0801146
10866_at	HCP5	10866	ENSG00000206337	Early2	0.0421001
10365_at	KLF2	10365	ENSG00000127528	Late3	0.093166
9079_at	LDB2	9079	ENSG00000169744	Late2	0.1487
3615_at	IMPDH2	3615	ENSG00000178035	Early1	0.141711
23452_at	ANGPTL2	23452	ENSG00000136859	Late2	0.184523
4642_at	MYO1D	4642	ENSG00000176658	Early2	0.12173
51184_at	GPN3	51184	ENSG00000111231	Early1	0.190974
56963_at	RGMA	56963	ENSG00000182175	Early3	0.0739769
80758_at	PRR7	80758	ENSG00000131188	Early1	0.133918
3306_at	HSPA2	3306	ENSG00000126803	Early2	0.0258915
5493_at	PPL	5493	ENSG00000118898	Early1	0.0674914
2707_at	GJB3	2707	ENSG00000188910	Early1	0.0594025
54756_at	IL17RD	54756	ENSG00000144730	Early1	0.0860789
3936_at	LCP1	3936	ENSG00000136167	Late4	0.163395
64080_at	RBKS	64080	ENSG00000171174	Early2	0.118892
415_at	ARSE	415	ENSG00000157399	Early1	0.0464579
51715_at	RAB23	51715	ENSG00000112210	Early1	0.111831
415117_at	STX19	415117	ENSG00000178750	Early2	0.102778
56261_at	GPCPD1	56261	ENSG00000125772	Early1	0.102752
10578_at	GNLY	10578	ENSG00000115523	Late2	0.0591171
146909_at	KIF18B	146909	ENSG00000186185	Early1	0.170393
3376_at	IARS	3376	ENSG00000196305	Early1	0.210784
11151_at	CORO1A	11151	ENSG00000102879	Late4	0.139001
51284_at	TLR7	51284	ENSG00000196664	Early2	0.0906531
57088_at	PLSCR4	57088	ENSG00000114698	Early2	0.0916298
84823_at	LMNB2	84823	ENSG00000176619	Early1	0.166359
27122_at	DKK3	27122	ENSG00000050165	Late2	0.191184
91351_at	DDX60L	91351	ENSG00000181381	Early2	0.0586378
51299_at	NRN1	51299	ENSG00000124785	Early1	0.0553591
80201_at	HKDC1	80201	ENSG00000156510	Early1	0.0483175
3976_at	LIF	3976	ENSG00000128342	Early1	0.0908845
4092_at	SMAD7	4092	ENSG00000101665	Early2	0.0725053
1848_at	DUSP6	1848	ENSG00000139318	Early1	0.0589852
132720_at	C4orf32	132720	ENSG00000174749	Early1	0.0588645
79037_at	PVRIG	79037	ENSG00000213413	Early3	0.0978286
56990_at	CDC42SE2	56990	ENSG00000158985	Early2	0.0809495
5652_at	PRSS8	5652	ENSG00000052344	Early2	0.104328
79071_at	ELOVL6	79071	ENSG00000170522	Early2	0.0769187
130733_at	TMEM178A	130733	ENSG00000152154	Early2	0.029717
100130776_at	AGAP2-AS1	100130776	ENSG00000255737	Early1	0.100291
8780_at	RIOK3	8780	ENSG00000101782	Early2	0.136957
4833_at	NME4	4833	ENSG00000103202	Early1	0.101695
4998_at	ORC1	4998	ENSG00000085840	Early1	0.140314
9915_at	ARNT2	9915	ENSG00000172379	Early2	0.0273909
55920_at	RCC2	55920	ENSG00000179051	Early1	0.150665
23150_at	FRMD4B	23150	ENSG00000114541	Early2	0.0762372
4163_at	MCC	4163	ENSG00000171444	Late2	0.144082
51201_at	ZDHHC2	51201	ENSG00000104219	Early2	0.0504931
56898_at	BDH2	56898	ENSG00000164039	Early2	0.0613939
4121_at	MAN1A1	4121	ENSG00000111885	Early2	0.0649277
166815_at	TIGD2	166815	ENSG00000180346	Early1	0.106948
27141_at	CIDEB	27141	ENSG00000136305	Early2	0.102855
115_at	ADCY9	115	ENSG00000162104	Early2	0.109234
586_at	BCAT1	586	ENSG00000060982	Late2	0.156454
8795_at	TNFRSF10B	8795	ENSG00000120889	Early1	0.11564
5341_at	PLEK	5341	ENSG00000115956	Late3	0.145856
51700_at	CYB5R2	51700	ENSG00000166394	Early1	0.0986682
2826_at	CCR10	2826	ENSG00000184451	Early3	0.0800461
126669_at	SHE	126669	ENSG00000169291	Early3	0.110083
23179_at	RGL1	23179	ENSG00000143344	Early3	0.108734
5336_at	PLCG2	5336	ENSG00000197943	Early3	0.110596
9200_at	PTPLA	9200	ENSG00000165996	Early1	0.0895683
3276_at	PRMT1	3276	ENSG00000126457	Early1	0.19763
27134_at	TJP3	27134	ENSG00000105289	Early2	0.166011
55248_at	TMEM206	55248	ENSG00000065600	Early1	0.145438
55003_at	PAK1IP1	55003	ENSG00000111845	Early1	0.14582
8477_at	GPR65	8477	ENSG00000140030	Late3	0.131048
4313_at	MMP2	4313	ENSG00000087245	Late2	0.186332
1842_at	ECM2	1842	ENSG00000106823	Late2	0.118975
147381_at	CBLN2	147381	ENSG00000141668	Early2	0.0773403
5111_at	PCNA	5111	ENSG00000132646	Early1	0.163606
10528_at	NOP56	10528	ENSG00000101361	Early1	0.192037
91687_at	CENPL	91687	ENSG00000120334	Early1	0.172949
81855_at	SFXN3	81855	ENSG00000107819	Early1	0.0631093
122970_at	ACOT4	122970	ENSG00000177465	Early2	0.0805946
8522_at	GAS7	8522	ENSG00000007237	Late5	0.132704
27445_at	PCLO	27445	ENSG00000186472	Early2	0.0852095
51660_at	MPC1	51660	ENSG00000060762	Early2	0.131671
8351_at	HIST1H3D	8351	ENSG00000197409	Early2	0.0438532
51110_at	LACTB2	51110	ENSG00000147592	Early1	0.0866238
401548_at	SNX30	401548	ENSG00000148158	Early2	0.12414
874_at	CBR3	874	ENSG00000159231	Early1	0.0859893
10785_at	WDR4	10785	ENSG00000160193	Early1	0.126412
2739_at	GLO1	2739	ENSG00000124767	Early1	0.190195
8339_at	HIST1H2BG	8339	ENSG00000187990	Early2	0.0573744
55332_at	DRAM1	55332	ENSG00000136048	Late1	0.0929129
1462_at	VCAN	1462	ENSG00000038427	Late2	0.195681
387751_at	GVINP1	387751	ENSG00000254838	Early3	0.121435
2617_at	GARS	2617	ENSG00000106105	Early1	0.147159
1284_at	COL4A2	1284	ENSG00000134871	Late2	0.173241
51471_at	NAT8B	51471	ENSG00000144035	Early2	0.0587347
4060_at	LUM	4060	ENSG00000139329	Late2	0.163638
374618_at	TEX9	374618	ENSG00000151575	Early1	0.0600056
3625_at	INHBB	3625	ENSG00000163083	Late1	0.0688213
8792_at	TNFRSF11A	8792	ENSG00000141655	Early2	0.0606242
286530_at	P2RY8	286530	ENSG00000182162	Early3	0.116786
100289019_at	LOC100289019	100289019	ENSG00000234771	Early2	0.126058
7113_at	TMPRSS2	7113	ENSG00000184012	Early2	0.102829
149175_at	MANEAL	149175	ENSG00000185090	Early1	0.0685748
65065_at	NBEAL1	65065	ENSG00000144426	Early2	0.0774943
29780_at	PARVB	29780	ENSG00000188677	Late1	0.0673849
1264_at	CNN1	1264	ENSG00000130176	Late2	0.118518
7456_at	WIPF1	7456	ENSG00000115935	Late4	0.168204
79980_at	DSN1	79980	ENSG00000149636	Early1	0.141664
56911_at	MAP3K7CL	56911	ENSG00000156265	Late1	0.0924365
1376_at	CPT2	1376	ENSG00000157184	Early2	0.16487
54908_at	SPDL1	54908	ENSG00000040275	Early1	0.181489
90529_at	STPG1	90529	ENSG00000001460	Early2	0.145714
220323_at	OAF	220323	ENSG00000184232	Early2	0.112192
3620_at	IDO1	3620	ENSG00000131203	Late2	0.0743356
489_at	ATP2A3	489	ENSG00000074370	Early2	0.110842
1831_at	TSC22D3	1831	ENSG00000157514	Late4	0.106885
54502_at	RBM47	54502	ENSG00000163694	Early2	0.143688
100505806_at	SNHG18	100505806	ENSG00000250786	Early2	0.0195342
11031_at	RAB31	11031	ENSG00000168461	Late2	0.182362
51602_at	NOP58	51602	ENSG00000055044	Early1	0.196186
85407_at	NKD1	85407	ENSG00000140807	Early1	0.0659733
115362_at	GBP5	115362	ENSG00000154451	Late3	0.103193
1606_at	DGKA	1606	ENSG00000065357	Early2	0.0990668
2549_at	GAB1	2549	ENSG00000109458	Early2	0.150769
29887_at	SNX10	29887	ENSG00000086300	Late3	0.12024
7696_at	ZNF137P	7696	NA	Early2	0.0776874
22918_at	CD93	22918	ENSG00000125810	Late2	0.199768
8458_at	TTF2	8458	ENSG00000116830	Early1	0.139299
11130_at	ZWINT	11130	ENSG00000122952	Early1	0.171244
4065_at	LY75	4065	ENSG00000054219	Early2	0.0194335
11343_at	MGLL	11343	ENSG00000074416	Early2	0.132137
84969_at	TOX2	84969	ENSG00000124191	Late5	0.0477606
726_at	CAPN5	726	ENSG00000149260	Early2	0.164945
84951_at	TNS4	84951	ENSG00000131746	Early1	0.108843
151246_at	SGOL2	151246	ENSG00000163535	Early1	0.149032
55422_at	ZNF331	55422	ENSG00000130844	Early3	0.0836077
206358_at	SLC36A1	206358	ENSG00000123643	Early2	0.151722
114757_at	CYGB	114757	ENSG00000161544	Late5	0.132207
51311_at	TLR8	51311	ENSG00000101916	Late4	0.143248
84952_at	CGNL1	84952	ENSG00000128849	Early1	0.0216084
191_at	AHCY	191	ENSG00000101444	Early1	0.171477
7057_at	THBS1	7057	ENSG00000137801	Late2	0.0986466
7203_at	CCT3	7203	ENSG00000163468	Early1	0.215615
254439_at	C11orf86	254439	ENSG00000173237	Early2	0.100147
2350_at	FOLR2	2350	ENSG00000165457	Early2	0.121423
79654_at	HECTD3	79654	ENSG00000126107	Early2	0.164405
51191_at	HERC5	51191	ENSG00000138646	Early3	0.0595155
5050_at	PAFAH1B3	5050	ENSG00000079462	Early1	0.169856
58472_at	SQRDL	58472	ENSG00000137767	Early2	0.101484
79616_at	CCNJL	79616	ENSG00000135083	Early2	0.0984357
5159_at	PDGFRB	5159	ENSG00000113721	Late2	0.19182
6676_at	SPAG4	6676	ENSG00000061656	Early1	0.0725991
3419_at	IDH3A	3419	ENSG00000166411	Early2	0.0802201
25960_at	GPR124	25960	ENSG00000020181	Late2	0.193875
10969_at	EBNA1BP2	10969	ENSG00000117395	Early1	0.177043
604_at	BCL6	604	ENSG00000113916	Late3	0.139258
79733_at	E2F8	79733	ENSG00000129173	Early1	0.113001
4288_at	MKI67	4288	ENSG00000148773	Early1	0.137394
285440_at	CYP4V2	285440	ENSG00000145476	Early2	0.100433
1875_at	E2F5	1875	ENSG00000133740	Early1	0.123095
220_at	ALDH1A3	220	ENSG00000184254	Late2	0.0691816
126353_at	MISP	126353	ENSG00000099812	Early2	0.119877
3764_at	KCNJ8	3764	ENSG00000121361	Late1	0.0988967
55512_at	SMPD3	55512	ENSG00000103056	Early2	0.131689
3694_at	ITGB6	3694	ENSG00000115221	Early2	0.0420146
114915_at	EPB41L4A-AS1	114915	ENSG00000224032	Early1	0.0713817
3383_at	ICAM1	3383	ENSG00000090339	Late3	0.153968
79989_at	TTC26	79989	ENSG00000105948	Early1	0.174156
8445_at	DYRK2	8445	ENSG00000127334	Early2	0.114082
23312_at	DMXL2	23312	ENSG00000104093	Early2	0.0591449
144455_at	E2F7	144455	ENSG00000165891	Early1	0.152389
28970_at	C11orf54	28970	ENSG00000182919	Early2	0.104004
54069_at	MIS18A	54069	ENSG00000159055	Early1	0.173312
27292_at	DIMT1	27292	ENSG00000086189	Early1	0.175084
6275_at	S100A4	6275	ENSG00000196154	Late1	0.0738425
4521_at	NUDT1	4521	ENSG00000106268	Early1	0.15071
2788_at	GNG7	2788	ENSG00000176533	Early2	0.0961634
27000_at	DNAJC2	27000	ENSG00000105821	Early1	0.182261
84134_at	TOMM40L	84134	ENSG00000158882	Early2	0.0996594
8857_at	FCGBP	8857	ENSG00000090920	Early2	0.0819227
2950_at	GSTP1	2950	ENSG00000084207	Early1	0.103783
26747_at	NUFIP1	26747	ENSG00000083635	Early1	0.195413
7704_at	ZBTB16	7704	ENSG00000109906	Early2	0.0643185
11169_at	WDHD1	11169	ENSG00000198554	Early1	0.175535
9021_at	SOCS3	9021	ENSG00000184557	Late3	0.139057
127845_at	GOLT1A	127845	ENSG00000174567	Early1	0.0601258
26051_at	PPP1R16B	26051	ENSG00000101445	Early3	0.127024
51192_at	CKLF	51192	ENSG00000217555	Early1	0.12852
83990_at	BRIP1	83990	ENSG00000136492	Early1	0.146219
260425_at	MAGI3	260425	ENSG00000081026	Early2	0.176055
9123_at	SLC16A3	9123	ENSG00000141526	Late1	0.0587657
84722_at	PSRC1	84722	ENSG00000134222	Early1	0.153812
840_at	CASP7	840	ENSG00000165806	Early2	0.155009
10544_at	PROCR	10544	ENSG00000101000	Late2	0.0946545
9619_at	ABCG1	9619	ENSG00000160179	Early2	0.0719876
407026_at	MIR29C	407026	ENSG00000207966	Early2	0.0682136
340061_at	TMEM173	340061	ENSG00000184584	Early1	0.0659248
3428_at	IFI16	3428	ENSG00000163565	Late1	0.0624028
135932_at	TMEM139	135932	ENSG00000178826	Early2	0.0342067
347735_at	SERINC2	347735	ENSG00000168528	Early2	0.108337
55200_at	PLEKHG6	55200	ENSG00000008323	Early2	0.100917
6628_at	SNRPB	6628	ENSG00000125835	Early1	0.155098
54795_at	TRPM4	54795	ENSG00000130529	Early2	0.099504
7291_at	TWIST1	7291	ENSG00000122691	Late2	0.154777
3992_at	FADS1	3992	ENSG00000149485	Late1	0.108061
24147_at	FJX1	24147	ENSG00000179431	Late1	0.115285
241_at	ALOX5AP	241	ENSG00000132965	Late3	0.127181
360_at	AQP3	360	ENSG00000165272	Early1	0.0448355
10950_at	BTG3	10950	ENSG00000154640	Early1	0.0983567
55356_at	SLC22A15	55356	ENSG00000163393	Early1	0.0812168
55759_at	WDR12	55759	ENSG00000138442	Early1	0.181855
2710_at	GK	2710	ENSG00000198814	Early3	0.0294368
60436_at	TGIF2	60436	ENSG00000118707	Early1	0.115799
715_at	C1R	715	ENSG00000159403	Late2	0.175045
152189_at	CMTM8	152189	ENSG00000170293	Early1	0.0963268
56907_at	SPIRE1	56907	ENSG00000134278	Early1	0.0712971
196_at	AHR	196	ENSG00000106546	Early1	0.0785992
10099_at	TSPAN3	10099	ENSG00000140391	Early2	0.131642
170302_at	ARX	170302	ENSG00000004848	Early2	0.0342981
8744_at	TNFSF9	8744	ENSG00000125657	Early1	0.0783824
252839_at	TMEM9	252839	ENSG00000116857	Early1	0.149519
1428_at	CRYM	1428	ENSG00000103316	Early2	0.0454906
3561_at	IL2RG	3561	ENSG00000147168	Early2	0.0639316
116447_at	TOP1MT	116447	ENSG00000184428	Early1	0.114112
865_at	CBFB	865	ENSG00000067955	Early1	0.167083
9069_at	CLDN12	9069	ENSG00000157224	Early1	0.0745724
84058_at	WDR54	84058	ENSG00000005448	Late1	0.100737
117178_at	SSX2IP	117178	ENSG00000117155	Early1	0.140666
57045_at	TWSG1	57045	ENSG00000128791	Early1	0.0740639
389362_at	PSMG4	389362	ENSG00000180822	Early1	0.163776
83594_at	NUDT12	83594	ENSG00000112874	Early2	0.0664777
1298_at	COL9A2	1298	ENSG00000049089	Early1	0.0342766
51523_at	CXXC5	51523	ENSG00000171604	Early1	0.0799422
8609_at	KLF7	8609	ENSG00000118263	Early1	0.0833185
285958_at	SNHG15	285958	ENSG00000232956	Early1	0.144662
26499_at	PLEK2	26499	ENSG00000100558	Early1	0.103977
4118_at	MAL	4118	ENSG00000172005	Early2	0.0956056
55500_at	ETNK1	55500	ENSG00000139163	Early2	0.0590402
51719_at	CAB39	51719	ENSG00000135932	Early2	0.0918985
51303_at	FKBP11	51303	ENSG00000134285	Early1	0.0654808
1841_at	DTYMK	1841	ENSG00000168393	Early1	0.187587
7462_at	LAT2	7462	ENSG00000086730	Late4	0.175647
144577_at	C12orf66	144577	ENSG00000174206	Early1	0.118764
29802_at	VPREB3	29802	ENSG00000128218	Early3	0.0795984
55303_at	GIMAP4	55303	ENSG00000133574	Early3	0.123625
84930_at	MASTL	84930	ENSG00000120539	Early1	0.142767
25996_at	REXO2	25996	ENSG00000076043	Early1	0.164378
6004_at	RGS16	6004	ENSG00000143333	Late1	0.122548
4583_at	MUC2	4583	ENSG00000198788	Early2	0.0630597
4173_at	MCM4	4173	ENSG00000104738	Early1	0.157522
151295_at	SLC23A3	151295	ENSG00000213901	Early2	0.0832419
9590_at	AKAP12	9590	ENSG00000131016	Late2	0.113798
26157_at	GIMAP2	26157	ENSG00000106560	Early1	0.0438133
8321_at	FZD1	8321	ENSG00000157240	Early3	0.0754753
9976_at	CLEC2B	9976	ENSG00000110852	Late4	0.160963
81031_at	SLC2A10	81031	ENSG00000197496	Early2	0.0135605
644_at	BLVRA	644	ENSG00000106605	Early1	0.0613798
100874032_at	PRRT3-AS1	100874032	ENSG00000230082	Early1	0.0791965
5217_at	PFN2	5217	ENSG00000070087	Early2	0.0422109
23404_at	EXOSC2	23404	ENSG00000130713	Early1	0.20542
54821_at	ERCC6L	54821	ENSG00000186871	Early1	0.134578
7089_at	TLE2	7089	ENSG00000065717	Early2	0.0368357
100505839_at	SH3PXD2A-AS1	100505839	NA	Early1	0.0683636
146722_at	CD300LF	146722	ENSG00000186074	Early3	0.0909833
11096_at	ADAMTS5	11096	ENSG00000154736	Late2	0.12374
79000_at	AUNIP	79000	ENSG00000127423	Early1	0.151064
5205_at	ATP8B1	5205	ENSG00000081923	Early2	0.132405
60489_at	APOBEC3G	60489	ENSG00000239713	Early3	0.0840783
6948_at	TCN2	6948	ENSG00000185339	Early2	0.077975
123036_at	TC2N	123036	ENSG00000165929	Early1	0.0435585
10360_at	NPM3	10360	ENSG00000107833	Early1	0.158511
29967_at	LRP12	29967	ENSG00000147650	Late2	0.0995763
7283_at	TUBG1	7283	ENSG00000131462	Early1	0.168145
91404_at	SESTD1	91404	ENSG00000187231	Early1	0.0821089
5118_at	PCOLCE	5118	ENSG00000106333	Late2	0.168825
2564_at	GABRE	2564	ENSG00000102287	Early1	0.0572552
8436_at	SDPR	8436	ENSG00000168497	Early3	0.0844149
9650_at	MTFR1	9650	ENSG00000066855	Early1	0.134193
5026_at	P2RX5	5026	ENSG00000083454	Early3	0.091241
11170_at	FAM107A	11170	ENSG00000168309	Early2	0.0869984
9133_at	CCNB2	9133	ENSG00000157456	Early1	0.157734
6938_at	TCF12	6938	ENSG00000140262	Early1	0.077874
10561_at	IFI44	10561	ENSG00000137965	Late2	0.0681847
[truncated: 6,001 more rows]
